# Supplementary material
Source: ML conference proceedings conference paper supplement (https://openreview.net/forum?id=a4sknPttwV)
Supplement: supplementary_material [file attachment]

# Datasheets for Datasets

TIMNIT GEBRU, Black in AI  
JAMIE MORGENSTERN, University of Washington  
BRIANA VECCHIONE, Cornell University  
JENNIFER WORTMAN VAUGHAN, Microsoft Research  
HANNA WALLACH, Microsoft Research  
HAL DAUMÉ III, Microsoft Research; University of Maryland  
KATE CRAWFORD, Microsoft Research

## 1 Introduction

Data plays a critical role in machine learning. Every machine learning model is trained and evaluated using data, quite often in the form of static datasets. The characteristics of these datasets fundamentally influence a model’s behavior: a model is unlikely to perform well in the wild if its deployment context does not match its training or evaluation datasets, or if these datasets reflect unwanted societal biases. Mismatches like this can have especially severe consequences when machine learning models are used in high-stakes domains, such as criminal justice [1, 13, 24], hiring [19], critical infrastructure [11, 21], and finance [18]. Even in other domains, mismatches may lead to loss of revenue or public relations setbacks. Of particular concern are recent examples showing that machine learning models can reproduce or amplify unwanted societal biases reflected in training datasets [4, 5, 12]. For these and other reasons, the World Economic Forum suggests that all entities should document the provenance, creation, and use of machine learning datasets in order to avoid discriminatory outcomes [25].

Although data provenance has been studied extensively in the databases community [3, 8], it is rarely discussed in the machine learning community. Documenting the creation and use of datasets has received even less attention. Despite the importance of data to machine learning, there is currently no standardized process for documenting machine learning datasets.

To address this gap, we propose *datasheets for datasets*. In the electronics industry, every component, no matter how simple or complex, is accompanied with a datasheet describing its operating characteristics, test results, recommended usage, and other information. By analogy, we propose that every

---

Authors’ addresses: Timnit Gebru, Black in AI; Jamie Morgenstern, University of Washington; Briana Vecchione, Cornell University; Jennifer Wortman Vaughan, Microsoft Research; Hanna Wallach, Microsoft Research; Hal Daumé III, Microsoft Research; University of Maryland; Kate Crawford, Microsoft Research.

dataset be accompanied with a datasheet that documents its motivation, composition, collection process, recommended uses, and so on. Datasheets for datasets have the potential to increase transparency and accountability within the machine learning community, mitigate unwanted societal biases in machine learning models, facilitate greater reproducibility of machine learning results, and help researchers and practitioners to select more appropriate datasets for their chosen tasks.

After outlining our objectives below, we describe the process by which we developed datasheets for datasets. We then provide a set of questions designed to elicit the information that a datasheet for a dataset might contain, as well as a workflow for dataset creators to use when answering these questions. We conclude with a summary of the impact to date of datasheets for datasets and a discussion of implementation challenges and avenues for future work.

## 1.1 Objectives

Datasheets for datasets are intended to address the needs of two key stakeholder groups: dataset creators and dataset consumers. For dataset creators, the primary objective is to encourage careful reflection on the process of creating, distributing, and maintaining a dataset, including any underlying assumptions, potential risks or harms, and implications of use. For dataset consumers, the primary objective is to ensure they have the information they need to make informed decisions about using a dataset. Transparency on the part of dataset creators is necessary for dataset consumers to be sufficiently well informed that they can select appropriate datasets for their chosen tasks and avoid unintentional misuse.<sup>1</sup>

Beyond these two key stakeholder groups, datasheets for datasets may be valuable to policy makers, consumer advocates, investigative journalists, individuals whose data is included in datasets, and individuals who may be impacted by models trained or evaluated using datasets. They also serve a secondary objective of facilitating greater reproducibility of machine learning results: researchers and practitioners without access to a dataset may be able to use the information in its datasheet to create alternative datasets with similar characteristics.

Although we provide a set of questions designed to elicit the information that a datasheet for a dataset might contain, these questions are not intended to be prescriptive. Indeed, we expect that datasheets will necessarily vary depending on factors such as the domain or existing organizational infrastructure and workflows. For example, some the questions are appropriate for academic researchers publicly releasing datasets for the purpose of enabling future

---

<sup>1</sup>We note that in some cases, the people creating a datasheet for a dataset may not be the dataset creators, as was the case with the example datasheets that we created as part of our development process.

research, but less relevant for product teams creating internal datasets for training proprietary models. As another example, Bender and Friedman [2] outline a proposal similar to datasheets for datasets specifically intended for language-based datasets. Their questions may be naturally integrated into a datasheet for a language-based dataset as appropriate.

We emphasize that the process of creating a datasheet is not intended to be automated. Although automated documentation processes are convenient, they run counter to our objective of encouraging dataset creators to carefully reflect on the process of creating, distributing, and maintaining a dataset.

## 2 Development Process

We refined the questions and workflow provided in the next section over a period of roughly two years, incorporating many rounds of feedback.

First, leveraging our own experiences as researchers with diverse backgrounds working in different domains and institutions, we drew on our knowledge of dataset characteristics, unintentional misuse, unwanted societal biases, and other issues to produce an initial set of questions designed to elicit information about these topics. We then “tested” these questions by creating example datasheets for two widely used datasets: Labeled Faces in the Wild [16] and Pang and Lee’s polarity dataset [22]. We chose these datasets in large part because their creators provided exemplary documentation, allowing us to easily find the answers to many of the questions. While creating these example datasheets, we found gaps in the questions, as well as redundancies and lack of clarity. We therefore refined the questions and distributed them to product teams in two major US-based technology companies, in some cases helping teams to create datasheets for their datasets and observing where the questions did not achieve their intended objectives. Contemporaneously, we circulated an initial draft of this paper to colleagues through social media and on arXiv (draft posted 23 March 2018). Via these channels we received extensive comments from dozens of researchers, practitioners, and policy makers. We also worked with a team of lawyers to review the questions from a legal perspective.

We incorporated this feedback to yield the questions and workflow provided in the next section: We added and removed questions, refined the content of the questions, and reordered the questions to better match the key stages of the dataset lifecycle. Based on our experiences with product teams, we reworded the questions to discourage yes/no answers, added a section on “Uses,” and deleted a section on “Legal and Ethical Considerations.” We found that product teams were more likely to answer questions about legal and ethical considerations if they were integrated into sections about the relevant stages of the dataset lifecycle rather than grouped together. Finally, following feedback from the team of lawyers, we removed questions that explicitly asked about compliance with regulations, and introduced factual questions intended to

elicit relevant information about compliance without requiring dataset creators to make legal judgments.

### 3 Questions and Workflow

In this section, we provide a set of questions designed to elicit the information that a datasheet for a dataset might contain, as well as a workflow for dataset creators to use when answering these questions. The questions are grouped into sections that roughly match the key stages of the dataset lifecycle: motivation, composition, collection process, preprocessing/cleaning/labeling, uses, distribution, and maintenance. This grouping encourages dataset creators to reflect on the process of creating, distributing, and maintaining a dataset, and even alter this process in response to their reflection. We note that not all questions will be applicable to all datasets; those that do not apply should be skipped.

To illustrate how these questions might be answered in practice, we provide in the appendix an example datasheet for Pang and Lee’s polarity dataset [22]. We answered some of the questions with “Unknown to the authors of the datasheet.” This is because we did not create the dataset ourselves and could not find the answers to these questions in the available documentation. For an example of a datasheet that was created by the creators of the corresponding dataset, please see that of Cao and Daumé [6].<sup>2</sup> We note that even dataset creators may be unable to answer all of the questions provided in this section. We recommend answering as many questions as possible rather than skipping the datasheet creation process entirely.

#### 3.1 Motivation

The questions in this section are primarily intended to encourage dataset creators to clearly articulate their reasons for creating the dataset and to promote transparency about funding interests. The latter may be particularly relevant for datasets created for research purposes.

- **For what purpose was the dataset created?** Was there a specific task in mind? Was there a specific gap that needed to be filled? Please provide a description.
- **Who created the dataset (e.g., which team, research group) and on behalf of which entity (e.g., company, institution, organization)?**
- **Who funded the creation of the dataset?** If there is an associated grant, please provide the name of the grantor and the grant name and number.
- **Any other comments?**

<sup>2</sup>See [https://github.com/TristaCao/into\\_inclusivecoref/blob/master/GICoref/datasheet-gicoref.md](https://github.com/TristaCao/into_inclusivecoref/blob/master/GICoref/datasheet-gicoref.md).

### 3.2 Composition

Dataset creators should read through these questions prior to any data collection and then provide answers once data collection is complete. Most of the questions in this section are intended to provide dataset consumers with the information they need to make informed decisions about using the dataset for their chosen tasks. Some of the questions are designed to elicit information about compliance with the EU’s General Data Protection Regulation (GDPR) or comparable regulations in other jurisdictions.

Questions that apply only to datasets that relate to people are grouped together at the end of the section. We recommend taking a broad interpretation of whether a dataset relates to people. For example, any dataset containing text that was written by people relates to people.

- **What do the instances that comprise the dataset represent (e.g., documents, photos, people, countries)?** Are there multiple types of instances (e.g., movies, users, and ratings; people and interactions between them; nodes and edges)? Please provide a description.
- **How many instances are there in total (of each type, if appropriate)?**
- **Does the dataset contain all possible instances or is it a sample (not necessarily random) of instances from a larger set?** If the dataset is a sample, then what is the larger set? Is the sample representative of the larger set (e.g., geographic coverage)? If so, please describe how this representativeness was validated/verified. If it is not representative of the larger set, please describe why not (e.g., to cover a more diverse range of instances, because instances were withheld or unavailable).
- **What data does each instance consist of?** “Raw” data (e.g., unprocessed text or images) or features? In either case, please provide a description.
- **Is there a label or target associated with each instance?** If so, please provide a description.
- **Is any information missing from individual instances?** If so, please provide a description, explaining why this information is missing (e.g., because it was unavailable). This does not include intentionally removed information, but might include, e.g., redacted text.
- **Are relationships between individual instances made explicit (e.g., users’ movie ratings, social network links)?** If so, please describe how these relationships are made explicit.
- **Are there recommended data splits (e.g., training, development/validation, testing)?** If so, please provide a description of these splits, explaining the rationale behind them.

- **Are there any errors, sources of noise, or redundancies in the dataset?** If so, please provide a description.
- **Is the dataset self-contained, or does it link to or otherwise rely on external resources (e.g., websites, tweets, other datasets)?** If it links to or relies on external resources, a) are there guarantees that they will exist, and remain constant, over time; b) are there official archival versions of the complete dataset (i.e., including the external resources as they existed at the time the dataset was created); c) are there any restrictions (e.g., licenses, fees) associated with any of the external resources that might apply to a dataset consumer? Please provide descriptions of all external resources and any restrictions associated with them, as well as links or other access points, as appropriate.
- **Does the dataset contain data that might be considered confidential (e.g., data that is protected by legal privilege or by doctor-patient confidentiality, data that includes the content of individuals' non-public communications)?** If so, please provide a description.
- **Does the dataset contain data that, if viewed directly, might be offensive, insulting, threatening, or might otherwise cause anxiety?** If so, please describe why.

If the dataset does not relate to people, you may skip the remaining questions in this section.

- **Does the dataset identify any subpopulations (e.g., by age, gender)?** If so, please describe how these subpopulations are identified and provide a description of their respective distributions within the dataset.
- **Is it possible to identify individuals (i.e., one or more natural persons), either directly or indirectly (i.e., in combination with other data) from the dataset?** If so, please describe how.
- **Does the dataset contain data that might be considered sensitive in any way (e.g., data that reveals race or ethnic origins, sexual orientations, religious beliefs, political opinions or union memberships, or locations; financial or health data; biometric or genetic data; forms of government identification, such as social security numbers; criminal history)?** If so, please provide a description.
- **Any other comments?**

### 3.3 Collection Process

As with the questions in the previous section, dataset creators should read through these questions prior to any data collection to flag potential issues and then provide answers once collection is complete. In addition to the goals outlined in the previous section, the questions in this section are designed to elicit information that may help researchers and practitioners to create alternative datasets with similar characteristics. Again, questions that apply

only to datasets that relate to people are grouped together at the end of the section.

- **How was the data associated with each instance acquired?** Was the data directly observable (e.g., raw text, movie ratings), reported by subjects (e.g., survey responses), or indirectly inferred/derived from other data (e.g., part-of-speech tags, model-based guesses for age or language)? If the data was reported by subjects or indirectly inferred/derived from other data, was the data validated/verified? If so, please describe how.
- **What mechanisms or procedures were used to collect the data (e.g., hardware apparatuses or sensors, manual human curation, software programs, software APIs)?** How were these mechanisms or procedures validated?
- **If the dataset is a sample from a larger set, what was the sampling strategy (e.g., deterministic, probabilistic with specific sampling probabilities)?**
- **Who was involved in the data collection process (e.g., students, crowdworkers, contractors) and how were they compensated (e.g., how much were crowdworkers paid)?**
- **Over what timeframe was the data collected?** Does this timeframe match the creation timeframe of the data associated with the instances (e.g., recent crawl of old news articles)? If not, please describe the timeframe in which the data associated with the instances was created.
- **Were any ethical review processes conducted (e.g., by an institutional review board)?** If so, please provide a description of these review processes, including the outcomes, as well as a link or other access point to any supporting documentation.

If the dataset does not relate to people, you may skip the remaining questions in this section.

- **Did you collect the data from the individuals in question directly, or obtain it via third parties or other sources (e.g., websites)?**
- **Were the individuals in question notified about the data collection?** If so, please describe (or show with screenshots or other information) how notice was provided, and provide a link or other access point to, or otherwise reproduce, the exact language of the notification itself.
- **Did the individuals in question consent to the collection and use of their data?** If so, please describe (or show with screenshots or other information) how consent was requested and provided, and provide a link or other access point to, or otherwise reproduce, the exact language to which the individuals consented.
- **If consent was obtained, were the consenting individuals provided with a mechanism to revoke their consent in the future or**

**for certain uses?** If so, please provide a description, as well as a link or other access point to the mechanism (if appropriate).

- **Has an analysis of the potential impact of the dataset and its use on data subjects (e.g., a data protection impact analysis) been conducted?** If so, please provide a description of this analysis, including the outcomes, as well as a link or other access point to any supporting documentation.
- **Any other comments?**

### 3.4 Preprocessing/cleaning/labeling

Dataset creators should read through these questions prior to any preprocessing, cleaning, or labeling and then provide answers once these tasks are complete. The questions in this section are intended to provide dataset consumers with the information they need to determine whether the “raw” data has been processed in ways that are compatible with their chosen tasks. For example, text that has been converted into a “bag-of-words” is not suitable for tasks involving word order.

- **Was any preprocessing/cleaning/labeling of the data done (e.g., discretization or bucketing, tokenization, part-of-speech tagging, SIFT feature extraction, removal of instances, processing of missing values)?** If so, please provide a description. If not, you may skip the remaining questions in this section.
- **Was the “raw” data saved in addition to the preprocessed/cleaned/labeled data (e.g., to support unanticipated future uses)?** If so, please provide a link or other access point to the “raw” data.
- **Is the software that was used to preprocess/clean/label the data available?** If so, please provide a link or other access point.
- **Any other comments?**

### 3.5 Uses

The questions in this section are intended to encourage dataset creators to reflect on the tasks for which the dataset should and should not be used. By explicitly highlighting these tasks, dataset creators can help dataset consumers to make informed decisions, thereby avoiding potential risks or harms.

- **Has the dataset been used for any tasks already?** If so, please provide a description.
- **Is there a repository that links to any or all papers or systems that use the dataset?** If so, please provide a link or other access point.
- **What (other) tasks could the dataset be used for?**



- **Is there anything about the composition of the dataset or the way it was collected and preprocessed/cleaned/labeled that might impact future uses?** For example, is there anything that a dataset consumer might need to know to avoid uses that could result in unfair treatment of individuals or groups (e.g., stereotyping, quality of service issues) or other risks or harms (e.g., legal risks, financial harms)? If so, please provide a description. Is there anything a dataset consumer could do to mitigate these risks or harms?
- **Are there tasks for which the dataset should not be used?** If so, please provide a description.
- **Any other comments?**

### 3.6 Distribution

Dataset creators should provide answers to these questions prior to distributing the dataset either internally within the entity on behalf of which the dataset was created or externally to third parties.

- **Will the dataset be distributed to third parties outside of the entity (e.g., company, institution, organization) on behalf of which the dataset was created?** If so, please provide a description.
- **How will the dataset will be distributed (e.g., tarball on website, API, GitHub)?** Does the dataset have a digital object identifier (DOI)?
- **When will the dataset be distributed?**
- **Will the dataset be distributed under a copyright or other intellectual property (IP) license, and/or under applicable terms of use (ToU)?** If so, please describe this license and/or ToU, and provide a link or other access point to, or otherwise reproduce, any relevant licensing terms or ToU, as well as any fees associated with these restrictions.
- **Have any third parties imposed IP-based or other restrictions on the data associated with the instances?** If so, please describe these restrictions, and provide a link or other access point to, or otherwise reproduce, any relevant licensing terms, as well as any fees associated with these restrictions.
- **Do any export controls or other regulatory restrictions apply to the dataset or to individual instances?** If so, please describe these restrictions, and provide a link or other access point to, or otherwise reproduce, any supporting documentation.
- **Any other comments?**

### 3.7 Maintenance

As with the questions in the previous section, dataset creators should provide answers to these questions prior to distributing the dataset. The questions

in this section are intended to encourage dataset creators to plan for dataset maintenance and communicate this plan to dataset consumers.

- **Who will be supporting/hosting/maintaining the dataset?**
- **How can the owner/curator/manager of the dataset be contacted (e.g., email address)?**
- **Is there an erratum?** If so, please provide a link or other access point.
- **Will the dataset be updated (e.g., to correct labeling errors, add new instances, delete instances)?** If so, please describe how often, by whom, and how updates will be communicated to dataset consumers (e.g., mailing list, GitHub)?
- **If the dataset relates to people, are there applicable limits on the retention of the data associated with the instances (e.g., were the individuals in question told that their data would be retained for a fixed period of time and then deleted)?** If so, please describe these limits and explain how they will be enforced.
- **Will older versions of the dataset continue to be supported/hosted/maintained?** If so, please describe how. If not, please describe how its obsolescence will be communicated to dataset consumers.
- **If others want to extend/augment/build on/contribute to the dataset, is there a mechanism for them to do so?** If so, please provide a description. Will these contributions be validated/verified? If so, please describe how. If not, why not? Is there a process for communicating/distributing these contributions to dataset consumers? If so, please provide a description.
- **Any other comments?**

#### 4 Impact and Challenges

Since circulating an initial draft of this paper in March 2018, datasheets for datasets have already gained traction in a number of settings. Academic researchers have adopted our proposal and released datasets with accompanying datasheets [e.g., 7, 10, 23, 26]. Microsoft, Google, and IBM have begun to pilot datasheets for datasets internally within product teams. Researchers at Google published follow-up work on *model cards* that document machine learning models [20] and released a *data card* (a lightweight version of a datasheet) along with the Open Images dataset [17]. Researchers at IBM proposed *factsheets* [14] that document various characteristics of AI services, including whether the datasets used to develop the services are accompanied with datasheets. The Data Nutrition Project incorporated some of the questions provided in the previous section into the latest release of their Dataset Nutrition Label [9]. Finally, the Partnership on AI, a multi-stakeholder organization focused on

studying and formulating best practices for developing and deploying AI technologies, is working on industry-wide documentation guidance that builds on datasheets for datasets, model cards, and factsheets.<sup>3</sup>

These initial successes have also revealed implementation challenges that may need to be addressed to support wider adoption. Chief among them is the need for dataset creators to modify the questions and workflow provided in the previous section based on their existing organizational infrastructure and workflows. We also note that the questions and workflow may pose problems for dynamic datasets. If a dataset changes only infrequently, we recommend accompanying updated versions with updated datasheets.

Datasheets for datasets do not provide a complete solution to mitigating unwanted societal biases or potential risks or harms. Dataset creators cannot anticipate every possible use of a dataset, and identifying unwanted societal biases often requires additional labels indicating demographic information about individuals, which may not be available to dataset creators for reasons including those individuals' data protection and privacy [15].

When creating datasets that relate to people, and hence their accompanying datasheets, it may be necessary for dataset creators to work with experts in other domains such as anthropology, sociology, and science and technology studies. There are complex and contextual social, historical, and geographical factors that influence how best to collect data from individuals in a manner that is respectful.

Finally, creating datasheets for datasets will necessarily impose overhead on dataset creators. Although datasheets may reduce the amount of time that dataset creators spend answering one-off questions about datasets, the process of creating a datasheet will always take time, and organizational infrastructure and workflows—not to mention incentives—will need to be modified to accommodate this investment.

Despite these implementation challenges, there are many benefits to creating datasheets for datasets. In addition to facilitating better communication between dataset creators and dataset consumers, datasheets provide an opportunity for dataset creators to distinguish themselves as prioritizing transparency and accountability. Ultimately, we believe that the benefits to the machine learning community outweigh the costs.

## Acknowledgments

We thank Peter Bailey, Emily Bender, Yoshua Bengio, Sarah Bird, Sarah Brown, Steven Bowles, Joy Buolamwini, Amanda Casari, Eric Charran, Alain Couillault, Lukas Dauterman, Leigh Dodds, Miroslav Dudík, Michael Ekstrand, Noémie Elhadad, Michael Golebiewski, Nick Gonsalves, Martin Hansen, Andy Hickl, Michael Hoffman, Scott Hoogerwerf, Eric Horvitz, Mingjing Huang, Surya

---

<sup>3</sup><https://www.partnershiponai.org/about-ml/>

Kallumadi, Ece Kamar, Krishnaram Kenthapadi, Emre Kiciman, Jacquelyn Kroner, Erik Learned-Miller, Lillian Lee, Jochen Leidner, Rob Mauceri, Brian Mcfee, Emily McReynolds, Bogdan Micu, Margaret Mitchell, Sangeeta Mudnal, Brendan O’Connor, Thomas Padilla, Bo Pang, Anjali Parikh, Lisa Peets, Alessandro Perina, Michael Philips, Barton Place, Sudha Rao, Jen Ren, David Van Riper, Anna Roth, Cynthia Rudin, Ben Shneiderman, Biplav Srivastava, Ankur Teredesai, Rachel Thomas, Martin Tomko, Panagiotis Tziachris, Meredith Whittaker, Hans Wolters, Ashly Yeo, Lu Zhang, and the attendees of the Partnership on AI’s April 2019 ABOUT ML workshop for valuable feedback.

## References

- [1] Don A Andrews, James Bonta, and J Stephen Wormith. 2006. The recent past and near future of risk and/or need assessment. *Crime & Delinquency* 52, 1 (2006), 7–27.
- [2] Emily M. Bender and Batya Friedman. 2018. Data Statements for Natural Language Processing: Toward Mitigating System Bias and Enabling Better Science. *Transactions of the Association for Computational Linguistics* 6 (2018), 587–604.
- [3] Anant P. Bhardwaj, Souvik Bhattacharjee, Amit Chavan, Amol Deshpande, Aaron J. Elmore, Samuel Madden, and Aditya G. Parameswaran. 2014. DataHub: Collaborative Data Science & Dataset Version Management at Scale. *CoRR* abs/1409.0798 (2014).
- [4] Tolga Bolukbasi, Kai-Wei Chang, James Y Zou, Venkatesh Saligrama, and Adam T Kalai. 2016. Man is to Computer Programmer as Woman is to Homemaker? Debiasing Word Embeddings. In *Advances in Neural Information Processing Systems (NeurIPS)*.
- [5] Joy Buolamwini and Timnit Gebru. 2018. Gender Shades: Intersectional Accuracy Disparities in Commercial Gender Classification. In *Proceedings of the Conference on Fairness, Accountability, and Transparency (FAT\*)*. 77–91.
- [6] Yang Trista Cao and Hal Daumé. 2020. Toward Gender-Inclusive Coreference Resolution. In *Proceedings of the Conference of the Association for Computational Linguistics (ACL)*. abs/1910.13913.
- [7] Yang Trista Cao and Hal Daumé, III. 2020. Toward Gender-Inclusive Coreference Resolution. In *Proceedings of the Conference of the Association for Computational Linguistics (ACL)*.
- [8] James Cheney, Laura Chiticariu, and Wang-Chiew Tan. 2009. Provenance in databases: Why, how, and where. *Foundations and Trends in Databases* 1, 4 (2009), 379–474.
- [9] Kasia Chmielinski, Sarah Newman, Matt Taylor, Josh Joseph, Kemi Thomas, Jessica Yurkofsky, and Yue Chelsea Qiu. 2020. The Dataset Nutrition Label (2nd Gen): Leveraging Context to Mitigate Harms in Artificial Intelligence. In *NeurIPS Workshop on Dataset Curation and Security*.
- [10] Eunsol Choi, He He, Mohit Iyyer, Mark Yatskar, Wen-tau Yih, Yejin Choi, Percy Liang, and Luke Zettlemoyer. 2018. QuAC : Question Answering in Context. In *Proceedings of the 2018 Conference on Empirical Methods in Natural Language Processing*.
- [11] Glenda Chui. 2017. Project will use AI to prevent or minimize electric grid failures. [Online; accessed 14-March-2018].
- [12] Jeffrey Dastin. 2018. Amazon scraps secret AI recruiting tool that showed bias against women. <https://www.reuters.com/article/us-amazon-com-jobs-automation-insight/amazon-scraps-secret-ai-recruiting-tool-that-showed-bias-against-women-idUSKCN1MK08G>
- [13] Clare Garvie, Alvaro Bedoya, and Jonathan Frankle. 2016. *The Perpetual Line-Up: Unregulated Police Face Recognition in America*. Georgetown Law, Center on Privacy &

- Technology, New Jersey Ave NW, Washington, DC.
- [14] Michael Hind, Sameep Mehta, Aleksandra Mojsilovic, Ravi Nair, Karthikeyan Natesan Ramamurthy, Alexandra Olteanu, and Kush R. Varshney. 2018. Increasing Trust in AI Services through Supplier’s Declarations of Conformity. *CoRR* abs/1808.07261 (2018).
  - [15] Kenneth Holstein, Jennifer Wortman Vaughan, Hal Daumé III, Miroslav Dudík, and Hanna M. Wallach. 2019. Improving Fairness in Machine Learning Systems: What Do Industry Practitioners Need?. In *2019 ACM CHI Conference on Human Factors in Computing Systems*.
  - [16] Gary B Huang, Manu Ramesh, Tamara Berg, and Erik Learned-Miller. 2007. *Labeled faces in the wild: A database for studying face recognition in unconstrained environments*. Technical Report 07-49. University of Massachusetts Amherst.
  - [17] Ivan Krasin, Tom Duerig, Neil Alldrin, Vittorio Ferrari, Sami Abu-El-Haija, Alina Kuznetsova, Hassan Rom, Jasper Uijlings, Stefan Popov, Shahab Kamali, Matteo Mallocci, Jordi Pont-Tuset, Andreas Veit, Serge Belongie, Victor Gomes, Abhinav Gupta, Chen Sun, Gal Chechik, David Cai, Zheyun Feng, Dhyanesh Narayanan, and Kevin Murphy. 2017. OpenImages: A public dataset for large-scale multi-label and multi-class image classification.
  - [18] Tom CW Lin. 2012. The new investor. *UCLA Law Review* 60 (2012), 678.
  - [19] G Mann and C O’Neil. 2016. Hiring Algorithms Are Not Neutral. <https://hbr.org/2016/12/hiring-algorithms-are-not-neutral>.
  - [20] Margaret Mitchell, Simone Wu, Andrew Zaldivar, Parker Barnes, Lucy Vasserman, Ben Hutchinson, Elena Spitzer, Inioluwa Deborah Raji, and Timnit Gebru. 2019. Model Cards for Model Reporting. In *Proceedings of the Conference on Fairness, Accountability, and Transparency (FAT\*)*. 220–229.
  - [21] Mary Catherine O’Connor. 2017. How AI Could Smarten Up Our Water System. [Online; accessed 14-March-2018].
  - [22] Bo Pang and Lillian Lee. 2004. A sentimental education: Sentiment analysis using subjectivity summarization based on minimum cuts. In *Proceedings of the 42nd Annual Meeting of the Association for Computational Linguistics*. 271.
  - [23] Ismaila Seck, Khoulood Dahmane, Pierre Duthon, and Gaëlle Loosli. 2018. Baselines and a datasheet for the Cerema AWP dataset. *CoRR* abs/1806.04016 (2018). <http://arxiv.org/abs/1806.04016>
  - [24] Doha Supply Systems. 2017. Facial Recognition. [Online; accessed 14-March-2018].
  - [25] World Economic Forum Global Future Council on Human Rights 2016–2018. 2018. How to Prevent Discriminatory Outcomes in Machine Learning. <https://www.weforum.org/whitepapers/how-to-prevent-discriminatory-outcomes-in-machine-learning>.
  - [26] Semih Yagcioglu, Aykut Erdem, Erkut Erdem, and Nazli Ikişler-Cinbis. 2018. RecipeQA: A Challenge Dataset for Multimodal Comprehension of Cooking Recipes. In *Proceedings of the 2018 Conference on Empirical Methods in Natural Language Processing*.

## **A Appendix**

In this appendix, we provide an example datasheet for Pang and Lee's polarity dataset [22] (figure 1 to figure 4).

| Movie Review Polarity                                                                                                                                                                                                                                                                                                                                                                                                                                                                                                                                                                                                                                                                                                                                                                                                                                                                                                                                                                                                                                                                                                                                                                                                                                                                                                                                                                                                                                                                                                                                                                                                          | Thumbs Up? Sentiment Classification using Machine Learning Techniques                                                                                                                                                                                                                                                                                                                                                                                                                                                                                                                                                                                                                                                                                                                                                                                                                                                                                                                                                                                                                                                                                                                                                                                                                                                                                                                                                                                                                                                                                                                                                                                                                                                                                                                                                                                                                                                                                                                                                                                                                                                                                                                                                                                                                                                                                                                                                                                                                                                                                                                                                                                                                                                                          |
|--------------------------------------------------------------------------------------------------------------------------------------------------------------------------------------------------------------------------------------------------------------------------------------------------------------------------------------------------------------------------------------------------------------------------------------------------------------------------------------------------------------------------------------------------------------------------------------------------------------------------------------------------------------------------------------------------------------------------------------------------------------------------------------------------------------------------------------------------------------------------------------------------------------------------------------------------------------------------------------------------------------------------------------------------------------------------------------------------------------------------------------------------------------------------------------------------------------------------------------------------------------------------------------------------------------------------------------------------------------------------------------------------------------------------------------------------------------------------------------------------------------------------------------------------------------------------------------------------------------------------------|------------------------------------------------------------------------------------------------------------------------------------------------------------------------------------------------------------------------------------------------------------------------------------------------------------------------------------------------------------------------------------------------------------------------------------------------------------------------------------------------------------------------------------------------------------------------------------------------------------------------------------------------------------------------------------------------------------------------------------------------------------------------------------------------------------------------------------------------------------------------------------------------------------------------------------------------------------------------------------------------------------------------------------------------------------------------------------------------------------------------------------------------------------------------------------------------------------------------------------------------------------------------------------------------------------------------------------------------------------------------------------------------------------------------------------------------------------------------------------------------------------------------------------------------------------------------------------------------------------------------------------------------------------------------------------------------------------------------------------------------------------------------------------------------------------------------------------------------------------------------------------------------------------------------------------------------------------------------------------------------------------------------------------------------------------------------------------------------------------------------------------------------------------------------------------------------------------------------------------------------------------------------------------------------------------------------------------------------------------------------------------------------------------------------------------------------------------------------------------------------------------------------------------------------------------------------------------------------------------------------------------------------------------------------------------------------------------------------------------------------|
| <p style="text-align: center;"><b>Motivation</b></p> <p><b>For what purpose was the dataset created?</b> Was there a specific task in mind? Was there a specific gap that needed to be filled? Please provide a description.</p> <p>The dataset was created to enable research on predicting sentiment polarity—i.e., given a piece of English text, predict whether it has a positive or negative affect—or stance—toward its topic. The dataset was created intentionally with that task in mind, focusing on movie reviews as a place where affect/sentiment is frequently expressed.</p> <p><b>Who created the dataset (e.g., which team, research group) and on behalf of which entity (e.g., company, institution, organization)?</b></p> <p>The dataset was created by Bo Pang and Lillian Lee at Cornell University.</p> <p><b>Who funded the creation of the dataset?</b> If there is an associated grant, please provide the name of the grantor and the grant name and number. Funding was provided from five distinct sources: the National Science Foundation, the Department of the Interior, the National Business Center, Cornell University, and the Sloan Foundation.</p> <p><b>Any other comments?</b></p> <p>None.</p>                                                                                                                                                                                                                                                                                                                                                                                     | <div style="border: 1px solid black; padding: 5px;"> <p>these are words that could be used to describe the emotions of john sayles' characters in his latest , limbo . but no , i use them to describe myself after sitting through his latest little exercise in indie egomania . i can forgive many things , but using some hackneyed , whacked-out , screwed-up ? non ? -ending on a movie is unforgivable . i walked a half-mile in the rain and sat through two hours of typical , plodding sayles melodrama to get cheated by a complete and total copout finale . does sayles think he's roger corman ?</p> </div>                                                                                                                                                                                                                                                                                                                                                                                                                                                                                                                                                                                                                                                                                                                                                                                                                                                                                                                                                                                                                                                                                                                                                                                                                                                                                                                                                                                                                                                                                                                                                                                                                                                                                                                                                                                                                                                                                                                                                                                                                                                                                                                      |
| <p style="text-align: center;"><b>Composition</b></p> <p><b>What do the instances that comprise the dataset represent (e.g., documents, photos, people, countries)?</b> Are there multiple types of instances (e.g., movies, users, and ratings; people and interactions between them; nodes and edges)? Please provide a description.</p> <p>The instances are movie reviews extracted from newsgroup postings, together with a sentiment polarity rating for whether the text corresponds to a review with a rating that is either strongly positive (high number of stars) or strongly negative (low number of stars). The sentiment polarity rating is binary {positive, negative}. An example instance is shown in figure 1.</p> <p><b>How many instances are there in total (of each type, if appropriate)?</b></p> <p>There are 1,400 instances in total in the original (v1.x versions) and 2,000 instances in total in v2.0 (from 2014).</p> <p><b>Does the dataset contain all possible instances or is it a sample (not necessarily random) of instances from a larger set?</b> If the dataset is a sample, then what is the larger set? Is the sample representative of the larger set (e.g., geographic coverage)? If so, please describe how this representativeness was validated/verified. If it is not representative of the larger set, please describe why not (e.g., to cover a more diverse range of instances, because instances were withheld or unavailable).</p> <p>The dataset is a sample of instances. It is intended to be a random sample of movie reviews from newsgroup postings, with the</p> | <p>Figure 1. An example “negative polarity” instance, taken from the file neg/cv452.tok-18656.txt.</p> <p>exception that no more than 40 posts by a single author were included (see “Collection Process” below). No tests were run to determine representativeness.</p> <p><b>What data does each instance consist of?</b> “Raw” data (e.g., unprocessed text or images) or features? In either case, please provide a description.</p> <p>Each instance consists of the text associated with the review, with obvious ratings information removed from that text (some errors were found and later fixed). The text was down-cased and HTML tags were removed. Boilerplate newsgroup header/footer text was removed. Some additional unspecified automatic filtering was done. Each instance also has an associated target value: a positive (+1) or negative (-1) sentiment polarity rating based on the number of stars that that review gave (details on the mapping from number of stars to polarity is given below in “Data Preprocessing”).</p> <p><b>Is there a label or target associated with each instance?</b> If so, please provide a description.</p> <p>The label is the positive/negative sentiment polarity rating derived from the star rating, as described above.</p> <p><b>Is any information missing from individual instances?</b> If so, please provide a description, explaining why this information is missing (e.g., because it was unavailable). This does not include intentionally removed information, but might include, e.g., redacted text.</p> <p>Everything is included. No data is missing.</p> <p><b>Are relationships between individual instances made explicit (e.g., users' movie ratings, social network links)?</b> If so, please describe how these relationships are made explicit.</p> <p>None explicitly, though the original newsgroup postings include poster name and email address, so some information (such as threads, replies, or posts by the same author) could be extracted if needed.</p> <p><b>Are there recommended data splits (e.g., training, development/validation, testing)?</b> If so, please provide a description of these splits, explaining the rationale behind them.</p> <p>The instances come with a “cross-validation tag” to enable replication of cross-validation experiments; results are measured in classification accuracy.</p> <p><b>Are there any errors, sources of noise, or redundancies in the dataset?</b> If so, please provide a description.</p> <p>See preprocessing below.</p> <p><b>Is the dataset self-contained, or does it link to or otherwise rely on external resources (e.g., websites, tweets, other datasets)?</b> If it links</p> |

Fig. 1. Example datasheet for Pang and Lee’s polarity dataset [22], page 1.

<sup>1</sup>All information in this datasheet is taken from one of the following five sources: any errors that were introduced are the fault of the authors of the datasheet: <http://www.cs.cornell.edu/people/pabo/movie-review-data/>; <http://xxx.lanl.gov/pdf/cs/0409058v1>; <http://www.cs.cornell.edu/people/pabo/movie-review-data/rt-polaritydata>. README.1.0.txt; <http://www.cs.cornell.edu/people/pabo/movie-review-data/poldata>. README.2.0.txt.

| Movie Review Polarity                                                                                                                                                                                                                                                                                                                                                                                                                                                                                                                                                                                                                                                                                                                                                                                                                                             | Thumbs Up? Sentiment Classification using Machine Learning Techniques                                                                                                                                                                                                                                                                                                                                                                                                                                                                     |
|-------------------------------------------------------------------------------------------------------------------------------------------------------------------------------------------------------------------------------------------------------------------------------------------------------------------------------------------------------------------------------------------------------------------------------------------------------------------------------------------------------------------------------------------------------------------------------------------------------------------------------------------------------------------------------------------------------------------------------------------------------------------------------------------------------------------------------------------------------------------|-------------------------------------------------------------------------------------------------------------------------------------------------------------------------------------------------------------------------------------------------------------------------------------------------------------------------------------------------------------------------------------------------------------------------------------------------------------------------------------------------------------------------------------------|
| <p>to or relies on external resources, a) are there guarantees that they will exist, and remain constant, over time; b) are there official archival versions of the complete dataset (i.e., including the external resources as they existed at the time the dataset was created); c) are there any restrictions (e.g., licenses, fees) associated with any of the external resources that might apply to a dataset consumer? Please provide descriptions of all external resources and any restrictions associated with them, as well as links or other access points, as appropriate.</p> <p>The dataset is entirely self-contained.</p>                                                                                                                                                                                                                        | <p><b>programs, software APIs)?</b> How were these mechanisms or procedures validated?</p> <p>Unknown to the authors of the datasheet.</p>                                                                                                                                                                                                                                                                                                                                                                                                |
| <p><b>Does the dataset contain data that might be considered confidential (e.g., data that is protected by legal privilege or by doctor-patient confidentiality, data that includes the content of individuals' non-public communications)?</b> If so, please provide a description.</p> <p>Unknown to the authors of the datasheet.</p>                                                                                                                                                                                                                                                                                                                                                                                                                                                                                                                          | <p><b>If the dataset is a sample from a larger set, what was the sampling strategy (e.g., deterministic, probabilistic with specific sampling probabilities)?</b></p> <p>The sample of instances collected is English movie reviews from the <code>rec.arts.movies.reviews</code> newsgroup, from which a "number of stars" rating could be extracted. The sample is limited to forty reviews per unique author in order to achieve broader coverage by authorship. Beyond that, the sample is arbitrary.</p>                             |
| <p><b>Does the dataset contain data that, if viewed directly, might be offensive, insulting, threatening, or might otherwise cause anxiety?</b> If so, please describe why.</p> <p>Some movie reviews might contain moderately inappropriate or offensive language, but we do not expect this to be the norm.</p>                                                                                                                                                                                                                                                                                                                                                                                                                                                                                                                                                 | <p><b>Who was involved in the data collection process (e.g., students, crowdworkers, contractors) and how were they compensated (e.g., how much were crowdworkers paid)?</b></p> <p>Unknown to the authors of the datasheet.</p>                                                                                                                                                                                                                                                                                                          |
| <p><b>Does the dataset identify any subpopulations (e.g., by age, gender)?</b> If so, please describe how these subpopulations are identified and provide a description of their respective distributions within the dataset.</p> <p>No.</p>                                                                                                                                                                                                                                                                                                                                                                                                                                                                                                                                                                                                                      | <p><b>Over what timeframe was the data collected?</b> Does this timeframe match the creation timeframe of the data associated with the instances (e.g., recent crawl of old news articles)? If not, please describe the timeframe in which the data associated with the instances was created.</p> <p>Unknown to the authors of the datasheet.</p>                                                                                                                                                                                        |
| <p><b>Is it possible to identify individuals (i.e., one or more natural persons), either directly or indirectly (i.e., in combination with other data) from the dataset?</b> If so, please describe how.</p>                                                                                                                                                                                                                                                                                                                                                                                                                                                                                                                                                                                                                                                      | <p><b>Were any ethical review processes conducted (e.g., by an institutional review board)?</b> If so, please provide a description of these review processes, including the outcomes, as well as a link or other access point to any supporting documentation.</p> <p>Unknown to the authors of the datasheet.</p>                                                                                                                                                                                                                       |
| <p>Some personal information is retained from the newsgroup posting in the "raw form" of the dataset (as opposed to the "preprocessed" version, in which these are automatically removed), including the name and email address the author posted under (note that these are already public on the internet newsgroup archive).</p>                                                                                                                                                                                                                                                                                                                                                                                                                                                                                                                               | <p><b>Did you collect the data from the individuals in question directly, or obtain it via third parties or other sources (e.g., websites)?</b></p> <p>As described above, the data was collected from newsgroups.</p>                                                                                                                                                                                                                                                                                                                    |
| <p><b>Does the dataset contain data that might be considered sensitive in any way (e.g., data that reveals race or ethnic origins, sexual orientations, religious beliefs, political opinions or union memberships, or locations; financial or health data; biometric or genetic data; forms of government identification, such as social security numbers; criminal history)?</b> If so, please provide a description.</p> <p>Aside from the aforementioned name/email addresses, no.</p>                                                                                                                                                                                                                                                                                                                                                                        | <p><b>Were the individuals in question notified about the data collection?</b> If so, please describe (or show with screenshots or other information) how notice was provided, and provide a link or other access point to, or otherwise reproduce, the exact language of the notification itself.</p> <p>No. The data was crawled from public web sources, and the authors of the posts presumably knew that their posts would be public, but the authors were not explicitly informed that their posts were to be used in this way.</p> |
| <p><b>Any other comments?</b></p> <p>None.</p>                                                                                                                                                                                                                                                                                                                                                                                                                                                                                                                                                                                                                                                                                                                                                                                                                    | <p><b>Did the individuals in question consent to the collection and use of their data?</b> If so, please describe (or show with screenshots or other information) how consent was requested and provided, and provide a link or other access point to, or otherwise reproduce, the exact language to which the individuals consented.</p> <p>No (see previous question).</p>                                                                                                                                                              |
| <p style="text-align: center;"><b>Collection Process</b></p> <p><b>How was the data associated with each instance acquired?</b> Was the data directly observable (e.g., raw text, movie ratings), reported by subjects (e.g., survey responses), or indirectly inferred/derived from other data (e.g., part-of-speech tags, model-based guesses for age or language)? If the data was reported by subjects or indirectly inferred/derived from other data, was the data validated/verified? If so, please describe how.</p> <p>The data was mostly observable as raw text, except that the labels were extracted by the process described below. The data was collected by downloading reviews from the IMDb archive of the <code>rec.arts.movies.reviews</code> newsgroup, at <a href="http://reviews.imdb.com/Reviews">http://reviews.imdb.com/Reviews</a>.</p> | <p><b>Were the individuals in question notified about the data collection?</b> If so, please describe (or show with screenshots or other information) how notice was provided, and provide a link or other access point to, or otherwise reproduce, the exact language to which the individuals consented.</p> <p>No (see previous question).</p>                                                                                                                                                                                         |
| <p><b>What mechanisms or procedures were used to collect the data (e.g., hardware apparatuses or sensors, manual human curation, software</b></p>                                                                                                                                                                                                                                                                                                                                                                                                                                                                                                                                                                                                                                                                                                                 | <p><b>Has an analysis of the potential impact of the dataset and its use on data subjects (e.g., a data protection impact analysis) been conducted?</b> If so, please provide a description of this analysis, including the outcomes, as well as a link or other access point to any supporting documentation.</p> <p>N/A.</p>                                                                                                                                                                                                            |
| <p><b>Any other comments?</b></p>                                                                                                                                                                                                                                                                                                                                                                                                                                                                                                                                                                                                                                                                                                                                                                                                                                 | <p><b>Any other comments?</b></p>                                                                                                                                                                                                                                                                                                                                                                                                                                                                                                         |

Fig. 2. Example datasheet for Pang and Lee's polarity dataset [22], page 2.



| Movie Review Polarity                                                                                                                                                                                                                                                                                                                                                                                                                                                                                                                                                                                                                                                                                                                                                                                                                                | Thumbs Up? Sentiment Classification using Machine Learning Techniques                                                                                                                                                                                                                                                                                                                                                                                                                                                                               |  |
|------------------------------------------------------------------------------------------------------------------------------------------------------------------------------------------------------------------------------------------------------------------------------------------------------------------------------------------------------------------------------------------------------------------------------------------------------------------------------------------------------------------------------------------------------------------------------------------------------------------------------------------------------------------------------------------------------------------------------------------------------------------------------------------------------------------------------------------------------|-----------------------------------------------------------------------------------------------------------------------------------------------------------------------------------------------------------------------------------------------------------------------------------------------------------------------------------------------------------------------------------------------------------------------------------------------------------------------------------------------------------------------------------------------------|--|
| None.                                                                                                                                                                                                                                                                                                                                                                                                                                                                                                                                                                                                                                                                                                                                                                                                                                                | There is a repository, maintained by Pang/Lee through April 2012, at <a href="http://www.cs.cornell.edu/people/pabo/movie%2Dreview%2Ddata/otherexperiments.html">http://www.cs.cornell.edu/people/pabo/movie%2Dreview%2Ddata/otherexperiments.html</a> .                                                                                                                                                                                                                                                                                            |  |
| <b>Preprocessing/cleaning/labeling</b>                                                                                                                                                                                                                                                                                                                                                                                                                                                                                                                                                                                                                                                                                                                                                                                                               |                                                                                                                                                                                                                                                                                                                                                                                                                                                                                                                                                     |  |
| <p>Was any preprocessing/cleaning/labeling of the data done (e.g., discretization or bucketing, tokenization, part-of-speech tagging, SIFT feature extraction, removal of instances, processing of missing values)? If so, please provide a description. If not, you may skip the remaining questions in this section.</p>                                                                                                                                                                                                                                                                                                                                                                                                                                                                                                                           | <p>What (other) tasks could the dataset be used for?</p>                                                                                                                                                                                                                                                                                                                                                                                                                                                                                            |  |
| <p>Instances for which an explicit rating could not be found were discarded. Also only instances with strongly-positive or strongly-negative ratings were retained. Star ratings were extracted by automatically looking for text like “**** out of *****” in the review, using that as a label, and then removing the corresponding text. When the star rating was out of five stars, anything at least four was considered positive and anything at most two negative; when out of four, three and up is considered positive, and one or less is considered negative. Occasionally half stars are missed which affects the labeling of negative examples. Everything in the middle was discarded. In order to ensure that sufficiently many authors are represented, at most 20 reviews (per positive/negative label) per author are included.</p> | <p>The dataset could be used for anything related to modeling or understanding movie reviews. For instance, one may induce a lexicon of words/phrases that are highly indicative of sentiment polarity, or learn to automatically generate movie reviews.</p>                                                                                                                                                                                                                                                                                       |  |
| <p>In a later version of the dataset (v1.1), non-English reviews were also removed.</p>                                                                                                                                                                                                                                                                                                                                                                                                                                                                                                                                                                                                                                                                                                                                                              | <p>Is there anything about the composition of the dataset or the way it was collected and preprocessed/cleaned/labeled that might impact future uses? For example, is there anything that a dataset consumer might need to know to avoid uses that could result in unfair treatment of individuals or groups (e.g., stereotyping, quality of service issues) or other risks or harms (e.g., legal risks, financial harms)? If so, please provide a description. Is there anything a dataset consumer could do to mitigate these risks or harms?</p> |  |
| <p>Some preprocessing errors were caught in later versions. The following fixes were made: (1) Some reviews had rating information in several places that was missed by the initial filters; these are removed. (2) Some reviews had unexpected/unparsed ranges and these were fixed. (3) Sometimes the boilerplate removal removed too much of the text.</p>                                                                                                                                                                                                                                                                                                                                                                                                                                                                                        | <p>There is minimal risk for harm: the data was already public, and in the preprocessed version, names and email addresses were removed.</p>                                                                                                                                                                                                                                                                                                                                                                                                        |  |
| <p>Was the “raw” data saved in addition to the preprocessed/cleaned/labeled data (e.g., to support unanticipated future uses)? If so, please provide a link or other access point to the “raw” data.</p>                                                                                                                                                                                                                                                                                                                                                                                                                                                                                                                                                                                                                                             | <p>Are there tasks for which the dataset should not be used? If so, please provide a description.</p>                                                                                                                                                                                                                                                                                                                                                                                                                                               |  |
| <p>Yes. The dataset itself contains all the raw data.</p>                                                                                                                                                                                                                                                                                                                                                                                                                                                                                                                                                                                                                                                                                                                                                                                            | <p>This data is collected solely in the movie review domain, so systems trained on it may or may not generalize to other sentiment prediction tasks. Consequently, such systems should not—without additional verification—be used to make consequential decisions about people.</p>                                                                                                                                                                                                                                                                |  |
| <p>Is the software that was used to preprocess/clean/label the data available? If so, please provide a link or other access point.</p>                                                                                                                                                                                                                                                                                                                                                                                                                                                                                                                                                                                                                                                                                                               | <p>Any other comments?</p>                                                                                                                                                                                                                                                                                                                                                                                                                                                                                                                          |  |
| <p>No.</p>                                                                                                                                                                                                                                                                                                                                                                                                                                                                                                                                                                                                                                                                                                                                                                                                                                           | <p>None.</p>                                                                                                                                                                                                                                                                                                                                                                                                                                                                                                                                        |  |
| <p>Any other comments?</p>                                                                                                                                                                                                                                                                                                                                                                                                                                                                                                                                                                                                                                                                                                                                                                                                                           | <b>Distribution</b>                                                                                                                                                                                                                                                                                                                                                                                                                                                                                                                                 |  |
| <p>None.</p>                                                                                                                                                                                                                                                                                                                                                                                                                                                                                                                                                                                                                                                                                                                                                                                                                                         | <p>Will the dataset be distributed to third parties outside of the entity (e.g., company, institution, organization) on behalf of which the dataset was created? If so, please provide a description.</p>                                                                                                                                                                                                                                                                                                                                           |  |
| <p>Yes, the dataset is publicly available on the internet.</p>                                                                                                                                                                                                                                                                                                                                                                                                                                                                                                                                                                                                                                                                                                                                                                                       |                                                                                                                                                                                                                                                                                                                                                                                                                                                                                                                                                     |  |
| <p>How will the dataset will be distributed (e.g., tarball on website, API, GitHub)? Does the dataset have a digital object identifier (DOI)?</p>                                                                                                                                                                                                                                                                                                                                                                                                                                                                                                                                                                                                                                                                                                    |                                                                                                                                                                                                                                                                                                                                                                                                                                                                                                                                                     |  |
| <p>The dataset is distributed on Bo Pang’s webpage at Cornell: <a href="http://www.cs.cornell.edu/people/pabo/movie-review-data">http://www.cs.cornell.edu/people/pabo/movie-review-data</a>. The dataset does not have a DOI and there is no redundant archive.</p>                                                                                                                                                                                                                                                                                                                                                                                                                                                                                                                                                                                 |                                                                                                                                                                                                                                                                                                                                                                                                                                                                                                                                                     |  |
| <p>When will the dataset be distributed?</p>                                                                                                                                                                                                                                                                                                                                                                                                                                                                                                                                                                                                                                                                                                                                                                                                         |                                                                                                                                                                                                                                                                                                                                                                                                                                                                                                                                                     |  |
| <p>The dataset was first released in 2002.</p>                                                                                                                                                                                                                                                                                                                                                                                                                                                                                                                                                                                                                                                                                                                                                                                                       |                                                                                                                                                                                                                                                                                                                                                                                                                                                                                                                                                     |  |
| <p>Will the dataset be distributed under a copyright or other intellectual property (IP) license, and/or under applicable terms of use (ToU)? If so, please describe this license and/or ToU, and provide a link or other access point to, or otherwise reproduce, any relevant licensing terms or ToU, as well as any fees associated with these restrictions.</p>                                                                                                                                                                                                                                                                                                                                                                                                                                                                                  |                                                                                                                                                                                                                                                                                                                                                                                                                                                                                                                                                     |  |
| <p>The crawled data copyright belongs to the authors of the reviews unless otherwise stated. There is no license, but there is a request to cite the corresponding paper if the dataset is used: <i>Thumbs up? Sentiment classification using machine learning techniques</i>. Bo Pang, Lillian Lee, and Shivakumar Vaithyanathan. Proceedings of EMNLP, 2002.</p>                                                                                                                                                                                                                                                                                                                                                                                                                                                                                   |                                                                                                                                                                                                                                                                                                                                                                                                                                                                                                                                                     |  |
| <b>Uses</b>                                                                                                                                                                                                                                                                                                                                                                                                                                                                                                                                                                                                                                                                                                                                                                                                                                          |                                                                                                                                                                                                                                                                                                                                                                                                                                                                                                                                                     |  |
| <p>Has the dataset been used for any tasks already? If so, please provide a description.</p>                                                                                                                                                                                                                                                                                                                                                                                                                                                                                                                                                                                                                                                                                                                                                         |                                                                                                                                                                                                                                                                                                                                                                                                                                                                                                                                                     |  |
| <p>At the time of publication, only the original paper (<a href="http://xxx.lanl.gov/pdf/cs/0409058v1">http://xxx.lanl.gov/pdf/cs/0409058v1</a>). Between then and 2012, a collection of papers that used this dataset was maintained at <a href="http://www.cs.cornell.edu/people/pabo/movie%2Dreview%2Ddata/otherexperiments.html">http://www.cs.cornell.edu/people/pabo/movie%2Dreview%2Ddata/otherexperiments.html</a>.</p>                                                                                                                                                                                                                                                                                                                                                                                                                      |                                                                                                                                                                                                                                                                                                                                                                                                                                                                                                                                                     |  |
| <p>Is there a repository that links to any or all papers or systems that use the dataset? If so, please provide a link or other access point.</p>                                                                                                                                                                                                                                                                                                                                                                                                                                                                                                                                                                                                                                                                                                    |                                                                                                                                                                                                                                                                                                                                                                                                                                                                                                                                                     |  |

Fig. 3. Example datasheet for Pang and Lee’s polarity dataset [22], page 3.

| Movie Review Polarity                                                                                                                                                                                                                                                                                                                                                                                                                                                                                                                                                                                                                                                                                                                                                                                                                                                                                                                                                                                                                                                                                                             | Thumbs Up? Sentiment Classification using Machine Learning Techniques                                                                                                                                                                                                                                                                                                                           |
|-----------------------------------------------------------------------------------------------------------------------------------------------------------------------------------------------------------------------------------------------------------------------------------------------------------------------------------------------------------------------------------------------------------------------------------------------------------------------------------------------------------------------------------------------------------------------------------------------------------------------------------------------------------------------------------------------------------------------------------------------------------------------------------------------------------------------------------------------------------------------------------------------------------------------------------------------------------------------------------------------------------------------------------------------------------------------------------------------------------------------------------|-------------------------------------------------------------------------------------------------------------------------------------------------------------------------------------------------------------------------------------------------------------------------------------------------------------------------------------------------------------------------------------------------|
| <p><b>Have any third parties imposed IP-based or other restrictions on the data associated with the instances?</b> If so, please describe these restrictions, and provide a link or other access point to, or otherwise reproduce, any relevant licensing terms, as well as any fees associated with these restrictions.</p> <p>No.</p> <p><b>Do any export controls or other regulatory restrictions apply to the dataset or to individual instances?</b> If so, please describe these restrictions, and provide a link or other access point to, or otherwise reproduce, any supporting documentation.</p> <p>Unknown to authors of the datasheet.</p> <p><b>Any other comments?</b></p> <p>None.</p>                                                                                                                                                                                                                                                                                                                                                                                                                           | <p>tion. Will these contributions be validated/verified? If so, please describe how. If not, why not? Is there a process for communicating/distributing these contributions to dataset consumers? If so, please provide a description.</p> <p>Others may do so and should contact the original authors about incorporating fixes/extensions.</p> <p><b>Any other comments?</b></p> <p>None.</p> |
| <b>Maintenance</b>                                                                                                                                                                                                                                                                                                                                                                                                                                                                                                                                                                                                                                                                                                                                                                                                                                                                                                                                                                                                                                                                                                                |                                                                                                                                                                                                                                                                                                                                                                                                 |
| <p><b>Who will be supporting/hosting/maintaining the dataset?</b><br/>Bo Pang is supporting/maintaining the dataset.</p>                                                                                                                                                                                                                                                                                                                                                                                                                                                                                                                                                                                                                                                                                                                                                                                                                                                                                                                                                                                                          |                                                                                                                                                                                                                                                                                                                                                                                                 |
| <p><b>How can the owner/curator/manager of the dataset be contacted (e.g., email address)?</b><br/>The curators of the dataset, Bo Pang and Lillian Lee, can be contacted at <a href="https://sites.google.com/site/bopang42/">https://sites.google.com/site/bopang42/</a> and <a href="http://www.cs.cornell.edu/home/lee">http://www.cs.cornell.edu/home/lee</a>, respectively.</p>                                                                                                                                                                                                                                                                                                                                                                                                                                                                                                                                                                                                                                                                                                                                             |                                                                                                                                                                                                                                                                                                                                                                                                 |
| <p><b>Is there an erratum?</b> If so, please provide a link or other access point. Since its initial release (v0.9) there have been three later releases (v1.0, v1.1, and v2.0). There is not an explicit erratum, but updates and known errors are specified in higher version README and <code>diff</code> files. There are several versions of these: v1.0: <a href="http://www.cs.cornell.edu/people/pabo/movie-review-data/README;">http://www.cs.cornell.edu/people/pabo/movie-review-data/README</a>; v1.1: <a href="http://www.cs.cornell.edu/people/pabo/movie%2Dreview%2Ddata/README.1.1">http://www.cs.cornell.edu/people/pabo/movie%2Dreview%2Ddata/README.1.1</a> and <a href="http://www.cs.cornell.edu/people/pabo/movie-review-data/diff.txt">http://www.cs.cornell.edu/people/pabo/movie-review-data/diff.txt</a>; v2.0: <a href="http://www.cs.cornell.edu/people/pabo/movie%2Dreview%2Ddata/poldata.README.2.0.txt">http://www.cs.cornell.edu/people/pabo/movie%2Dreview%2Ddata/poldata.README.2.0.txt</a>. Updates are listed on the dataset web page. (This datasheet largely summarizes these sources.)</p> |                                                                                                                                                                                                                                                                                                                                                                                                 |
| <p><b>Will the dataset be updated (e.g., to correct labeling errors, add new instances, delete instances)?</b> If so, please describe how often, by whom, and how updates will be communicated to dataset consumers (e.g., mailing list, GitHub)?</p> <p>This will be posted on the dataset webpage.</p>                                                                                                                                                                                                                                                                                                                                                                                                                                                                                                                                                                                                                                                                                                                                                                                                                          |                                                                                                                                                                                                                                                                                                                                                                                                 |
| <p><b>If the dataset relates to people, are there applicable limits on the retention of the data associated with the instances (e.g., were the individuals in question told that their data would be retained for a fixed period of time and then deleted)?</b> If so, please describe these limits and explain how they will be enforced.</p> <p>N/A.</p>                                                                                                                                                                                                                                                                                                                                                                                                                                                                                                                                                                                                                                                                                                                                                                        |                                                                                                                                                                                                                                                                                                                                                                                                 |
| <p><b>Will older versions of the dataset continue to be supported/hosted/maintained?</b> If so, please describe how. If not, please describe how its obsolescence will be communicated to dataset consumers.</p> <p>The dataset has already been updated; older versions are kept around for consistency.</p>                                                                                                                                                                                                                                                                                                                                                                                                                                                                                                                                                                                                                                                                                                                                                                                                                     |                                                                                                                                                                                                                                                                                                                                                                                                 |
| <p><b>If others want to extend/augment/build on/contribute to the dataset, is there a mechanism for them to do so?</b> If so, please provide a descrip-</p>                                                                                                                                                                                                                                                                                                                                                                                                                                                                                                                                                                                                                                                                                                                                                                                                                                                                                                                                                                       |                                                                                                                                                                                                                                                                                                                                                                                                 |

Fig. 4. Example datasheet for Pang and Lee’s polarity dataset [22], page 4.
