# Supplementary material
Source: ML conference proceedings conference paper supplement (https://openreview.net/forum?id=a4sknPttwV)

Success Rate by Main Tags

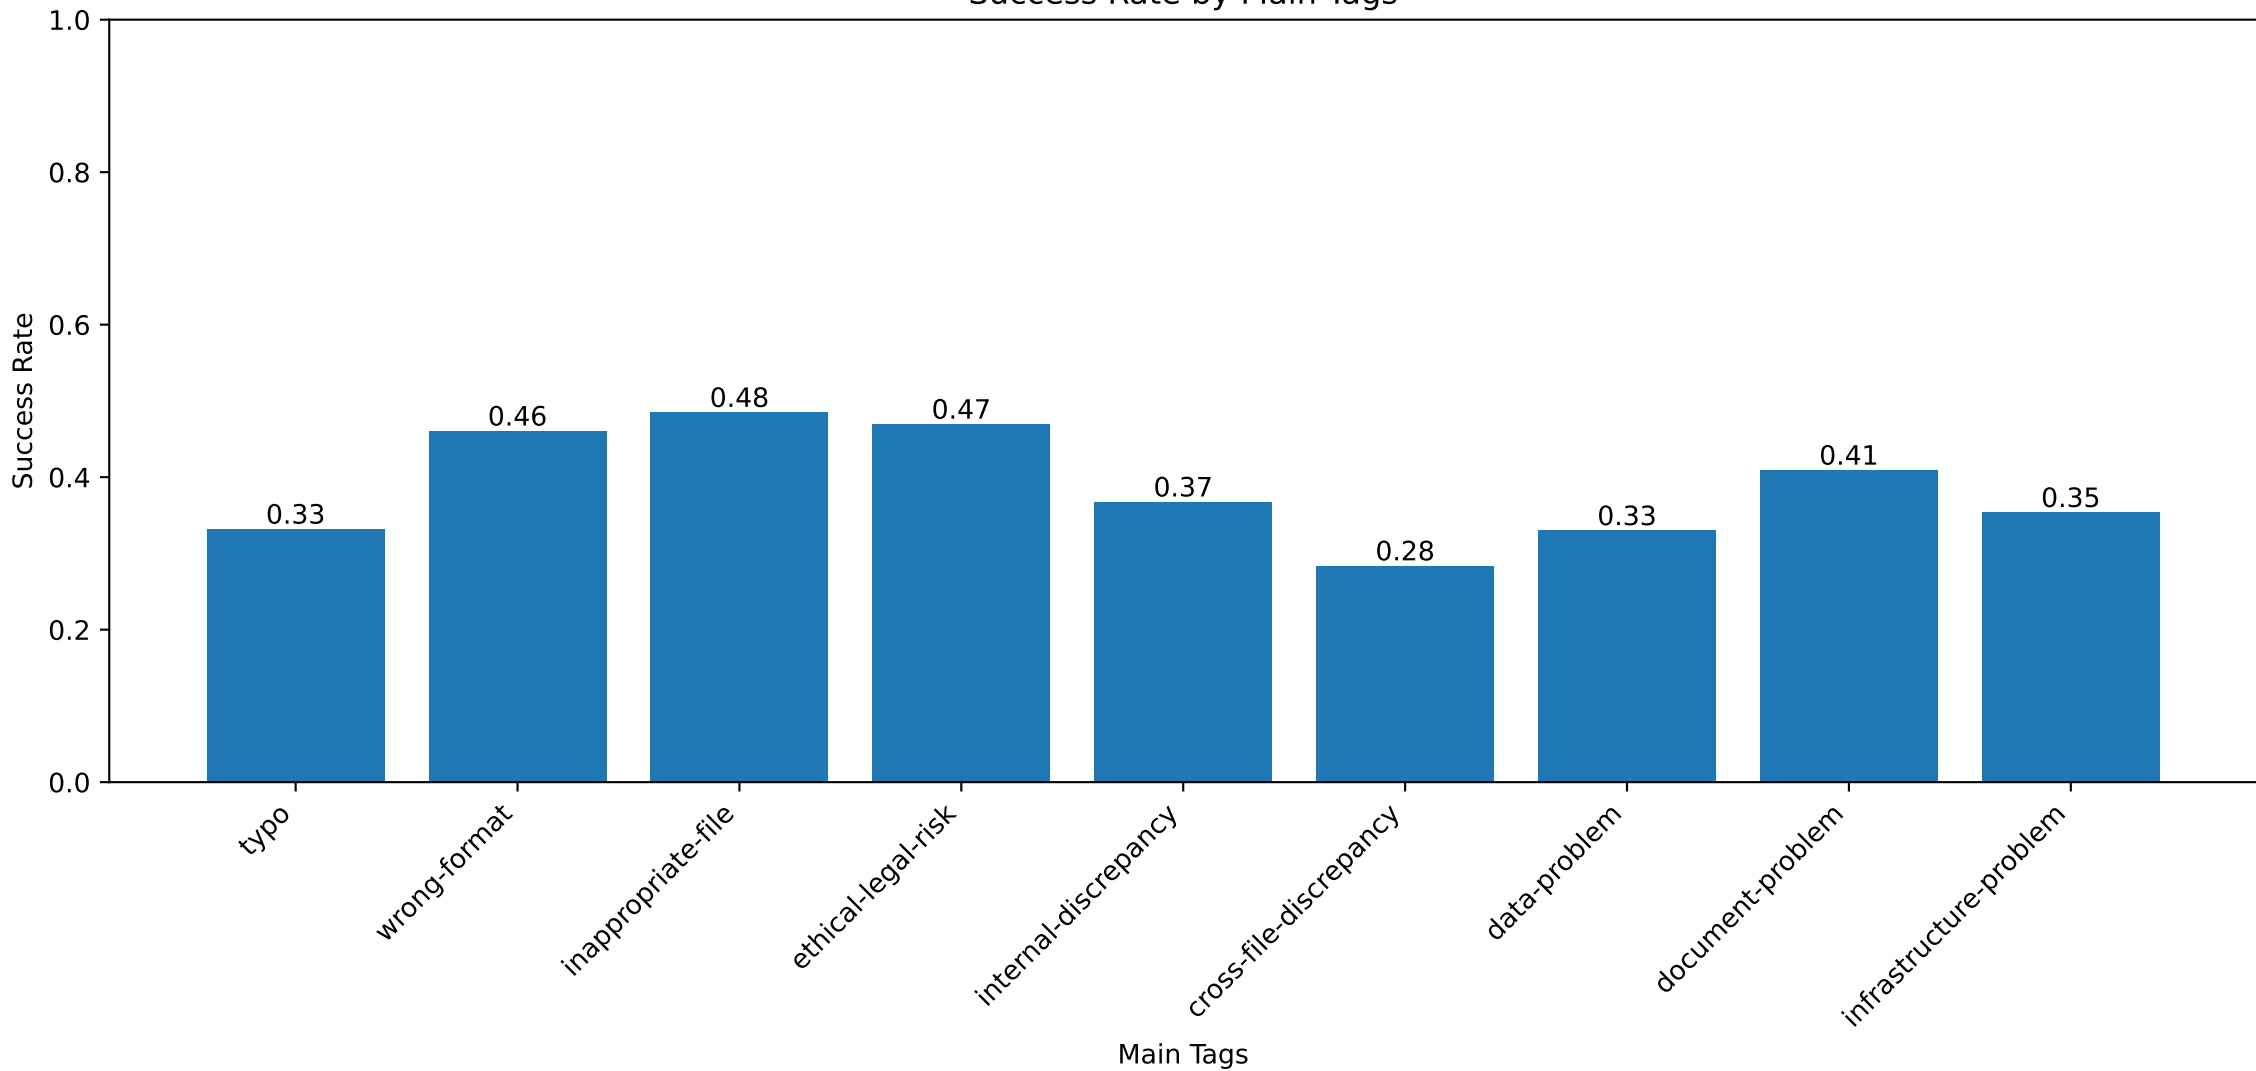

Supplement: supplementary_material [file attachment]

Success Rate by Hint\_level

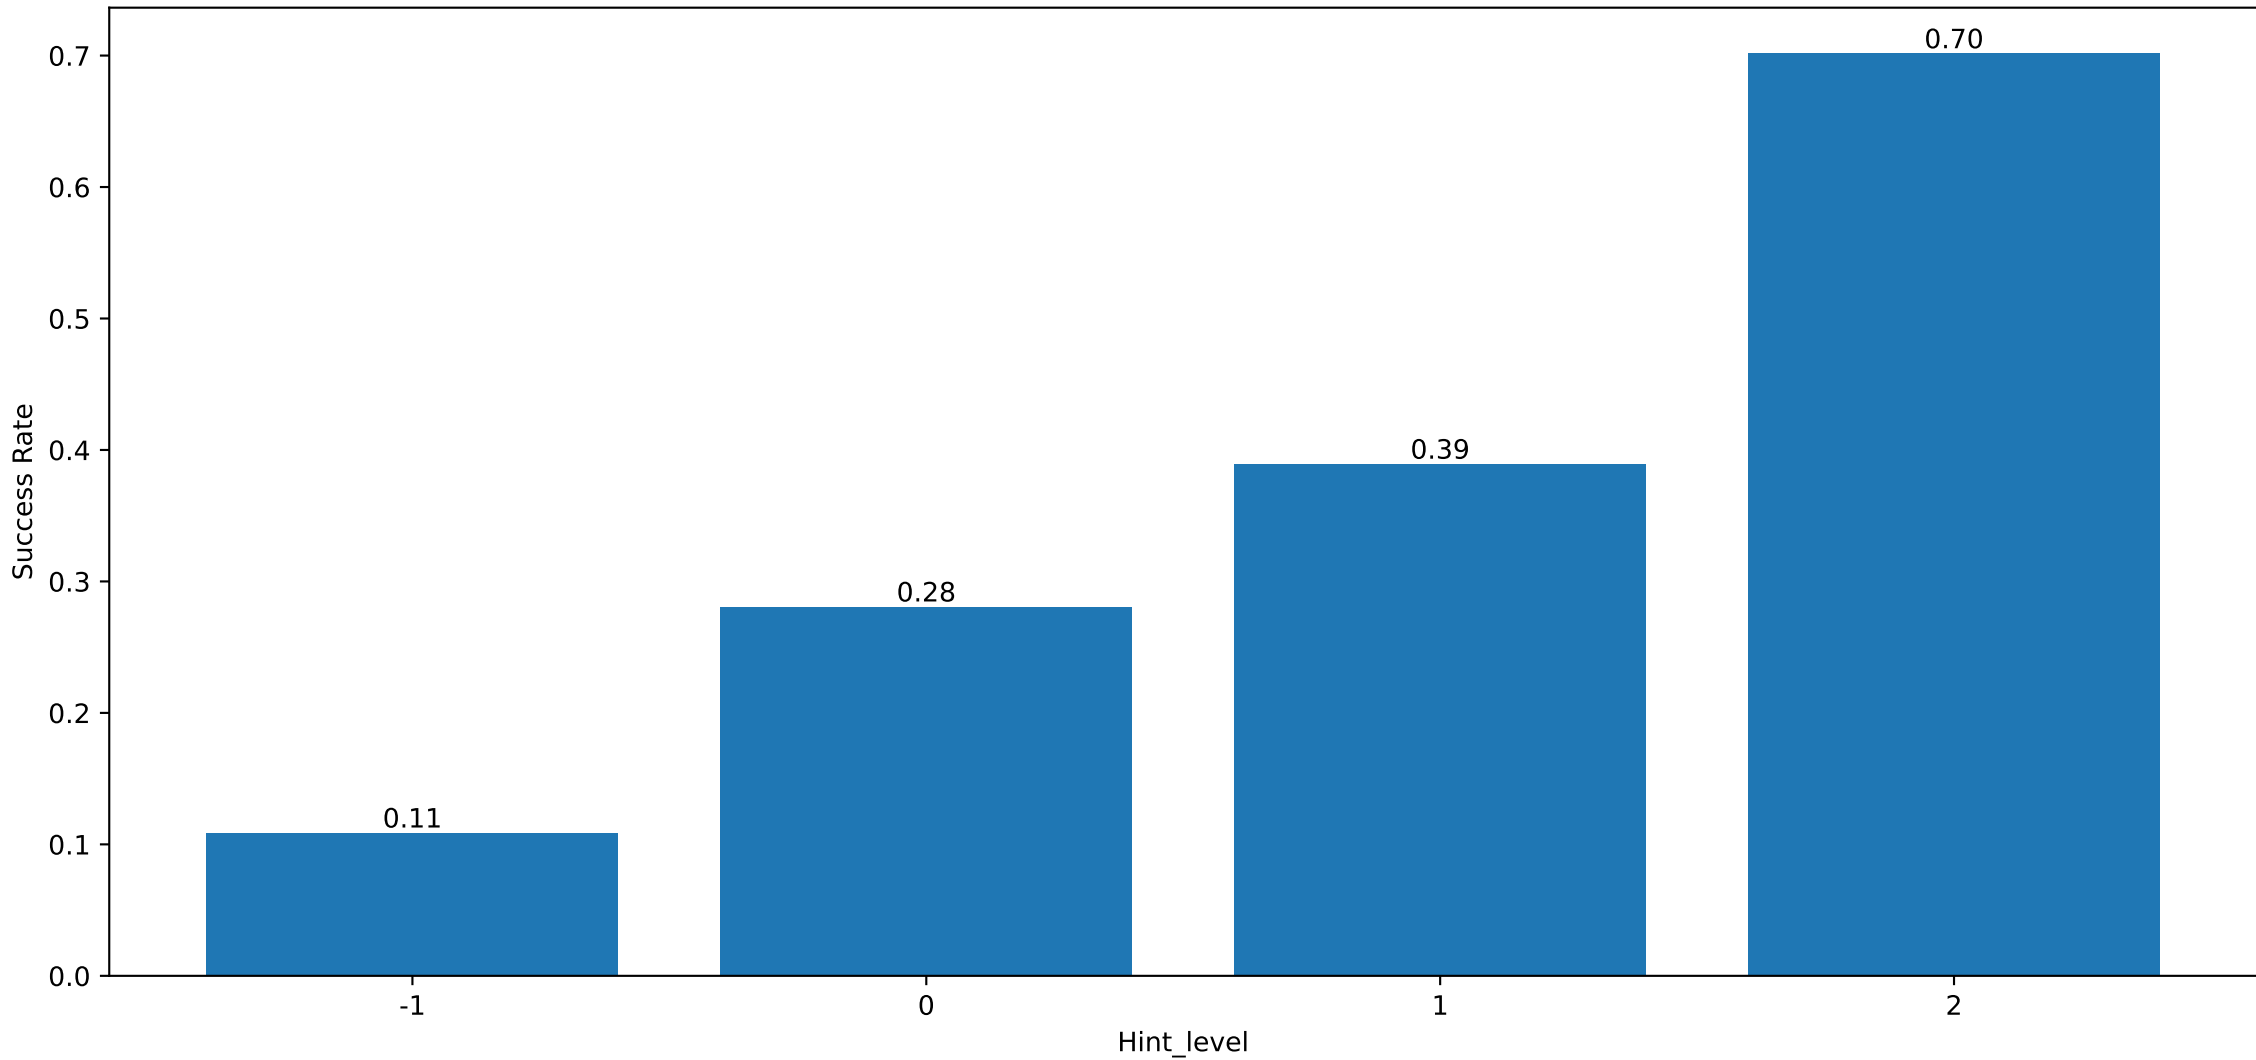

Supplement: supplementary_material [file attachment]

Success Rate by Sub Tags

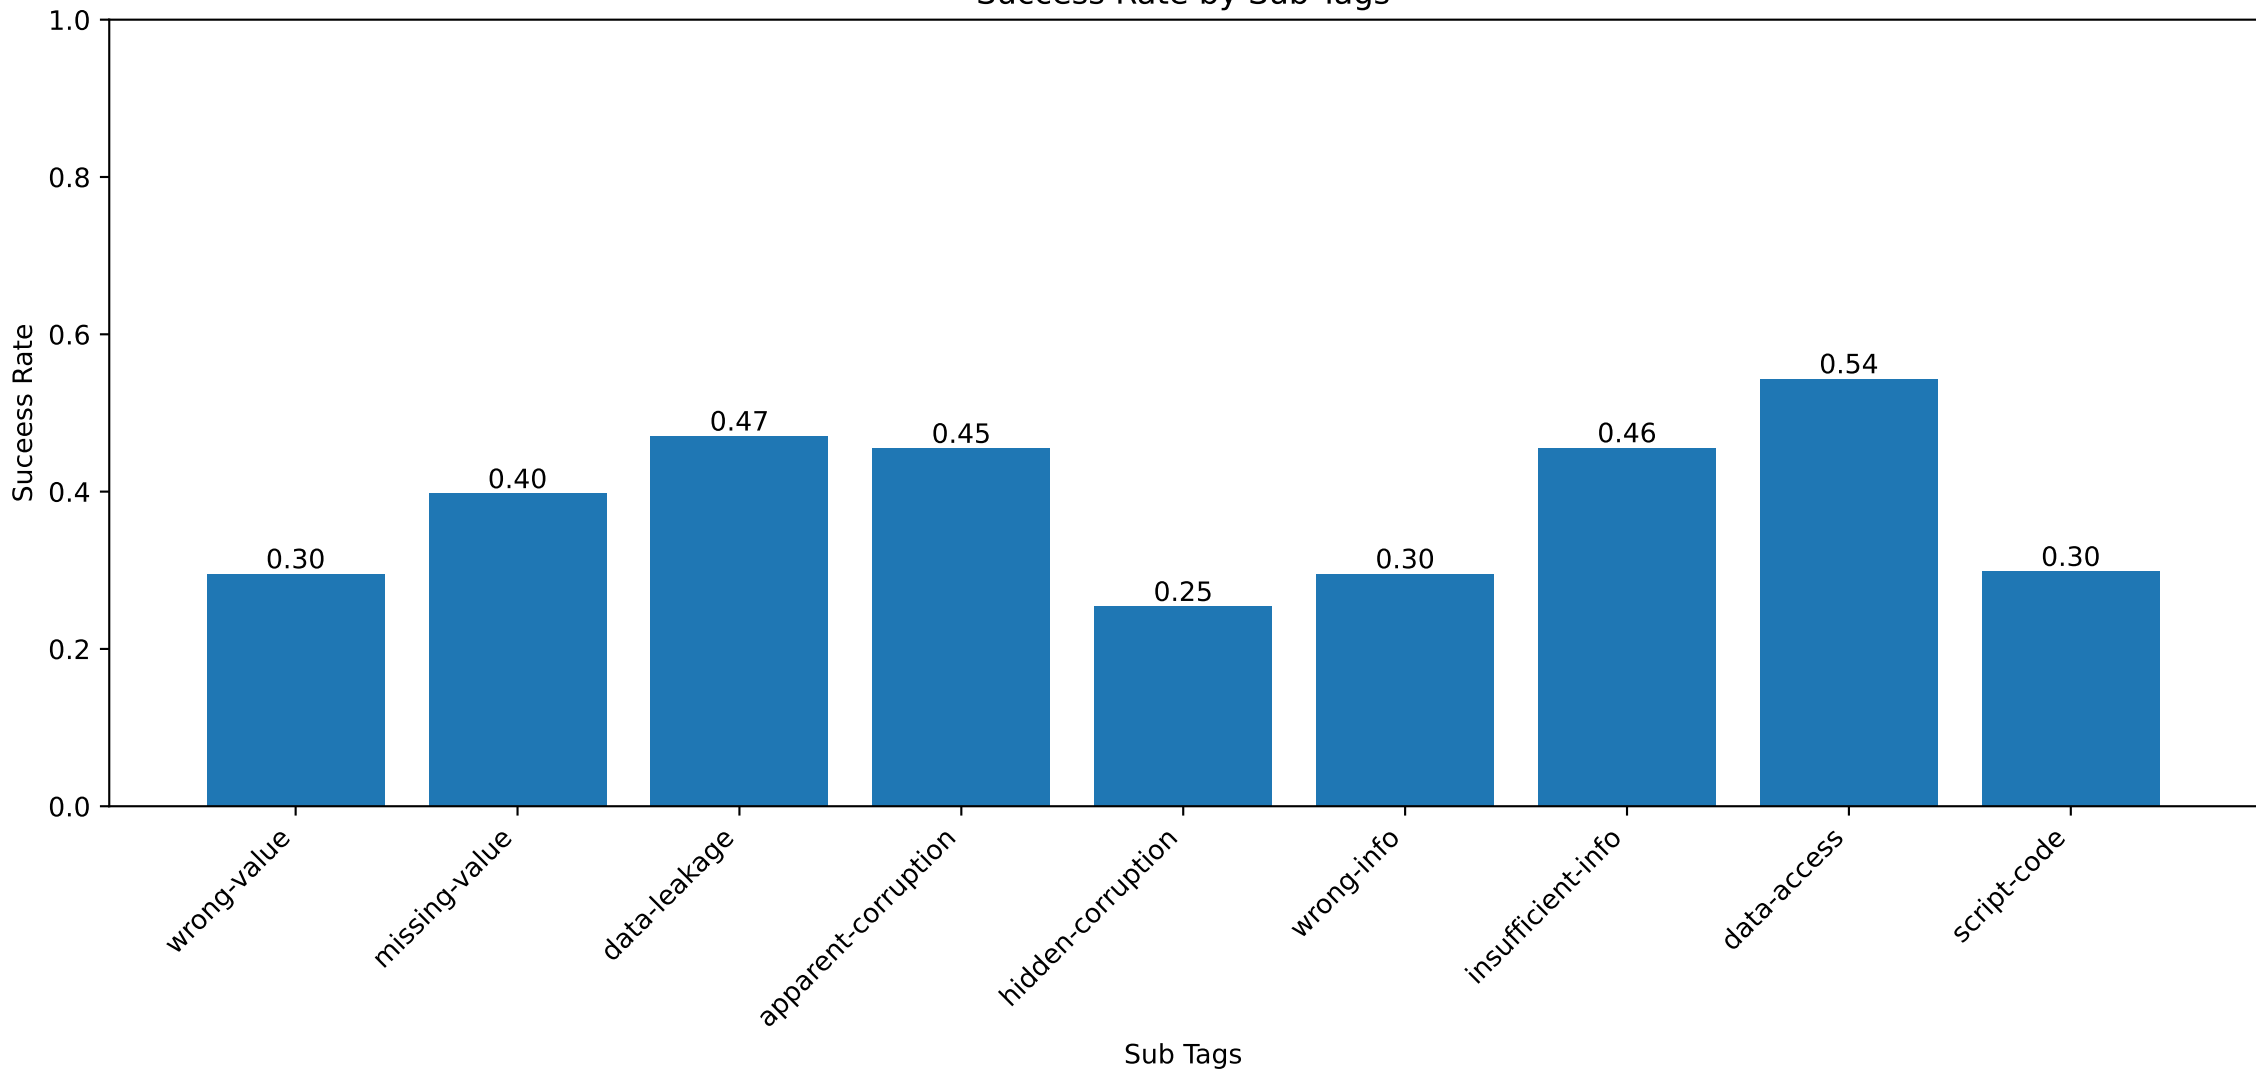

Supplement: supplementary_material [file attachment]

Success Rate by Type

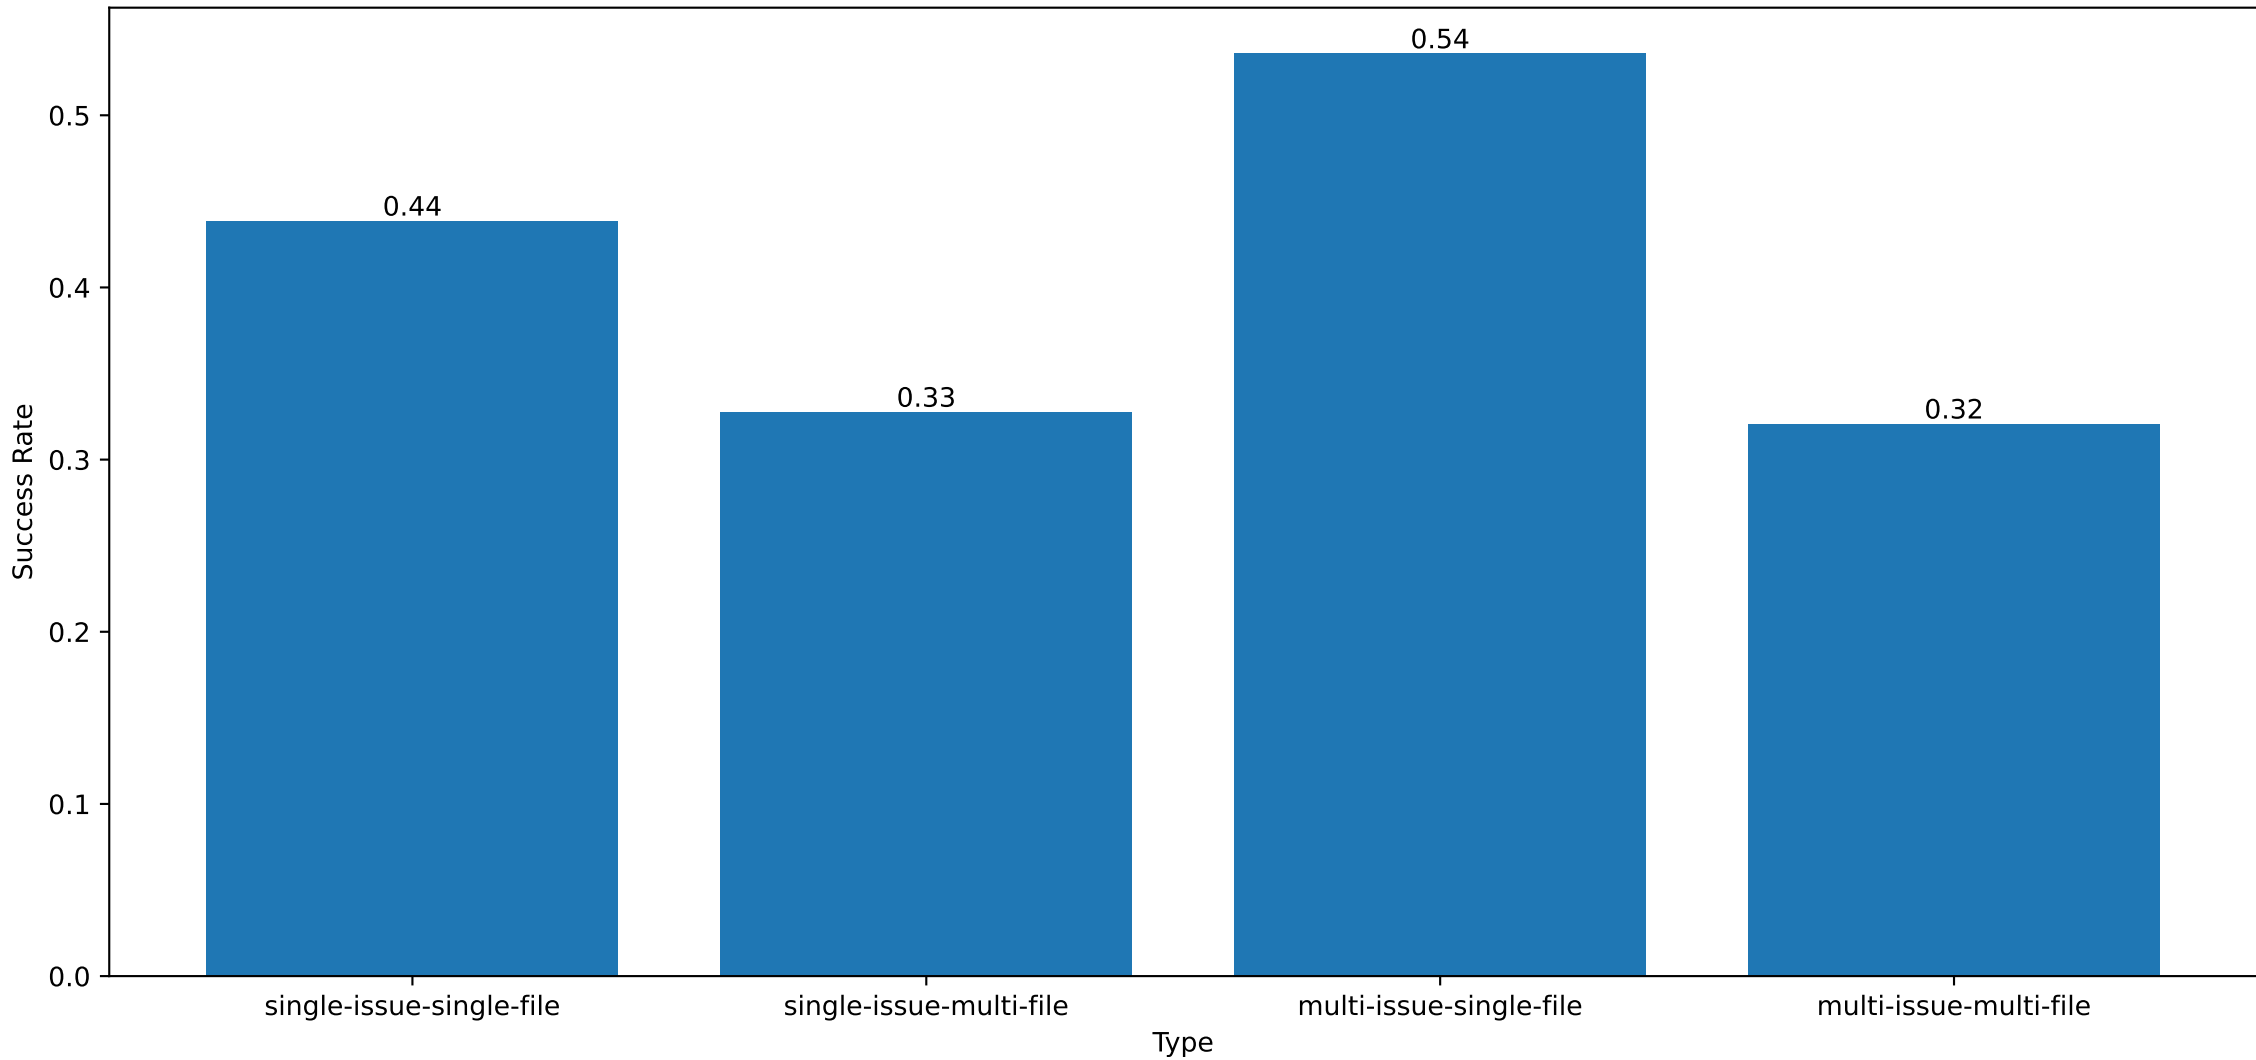

Supplement: supplementary_material [file attachment]

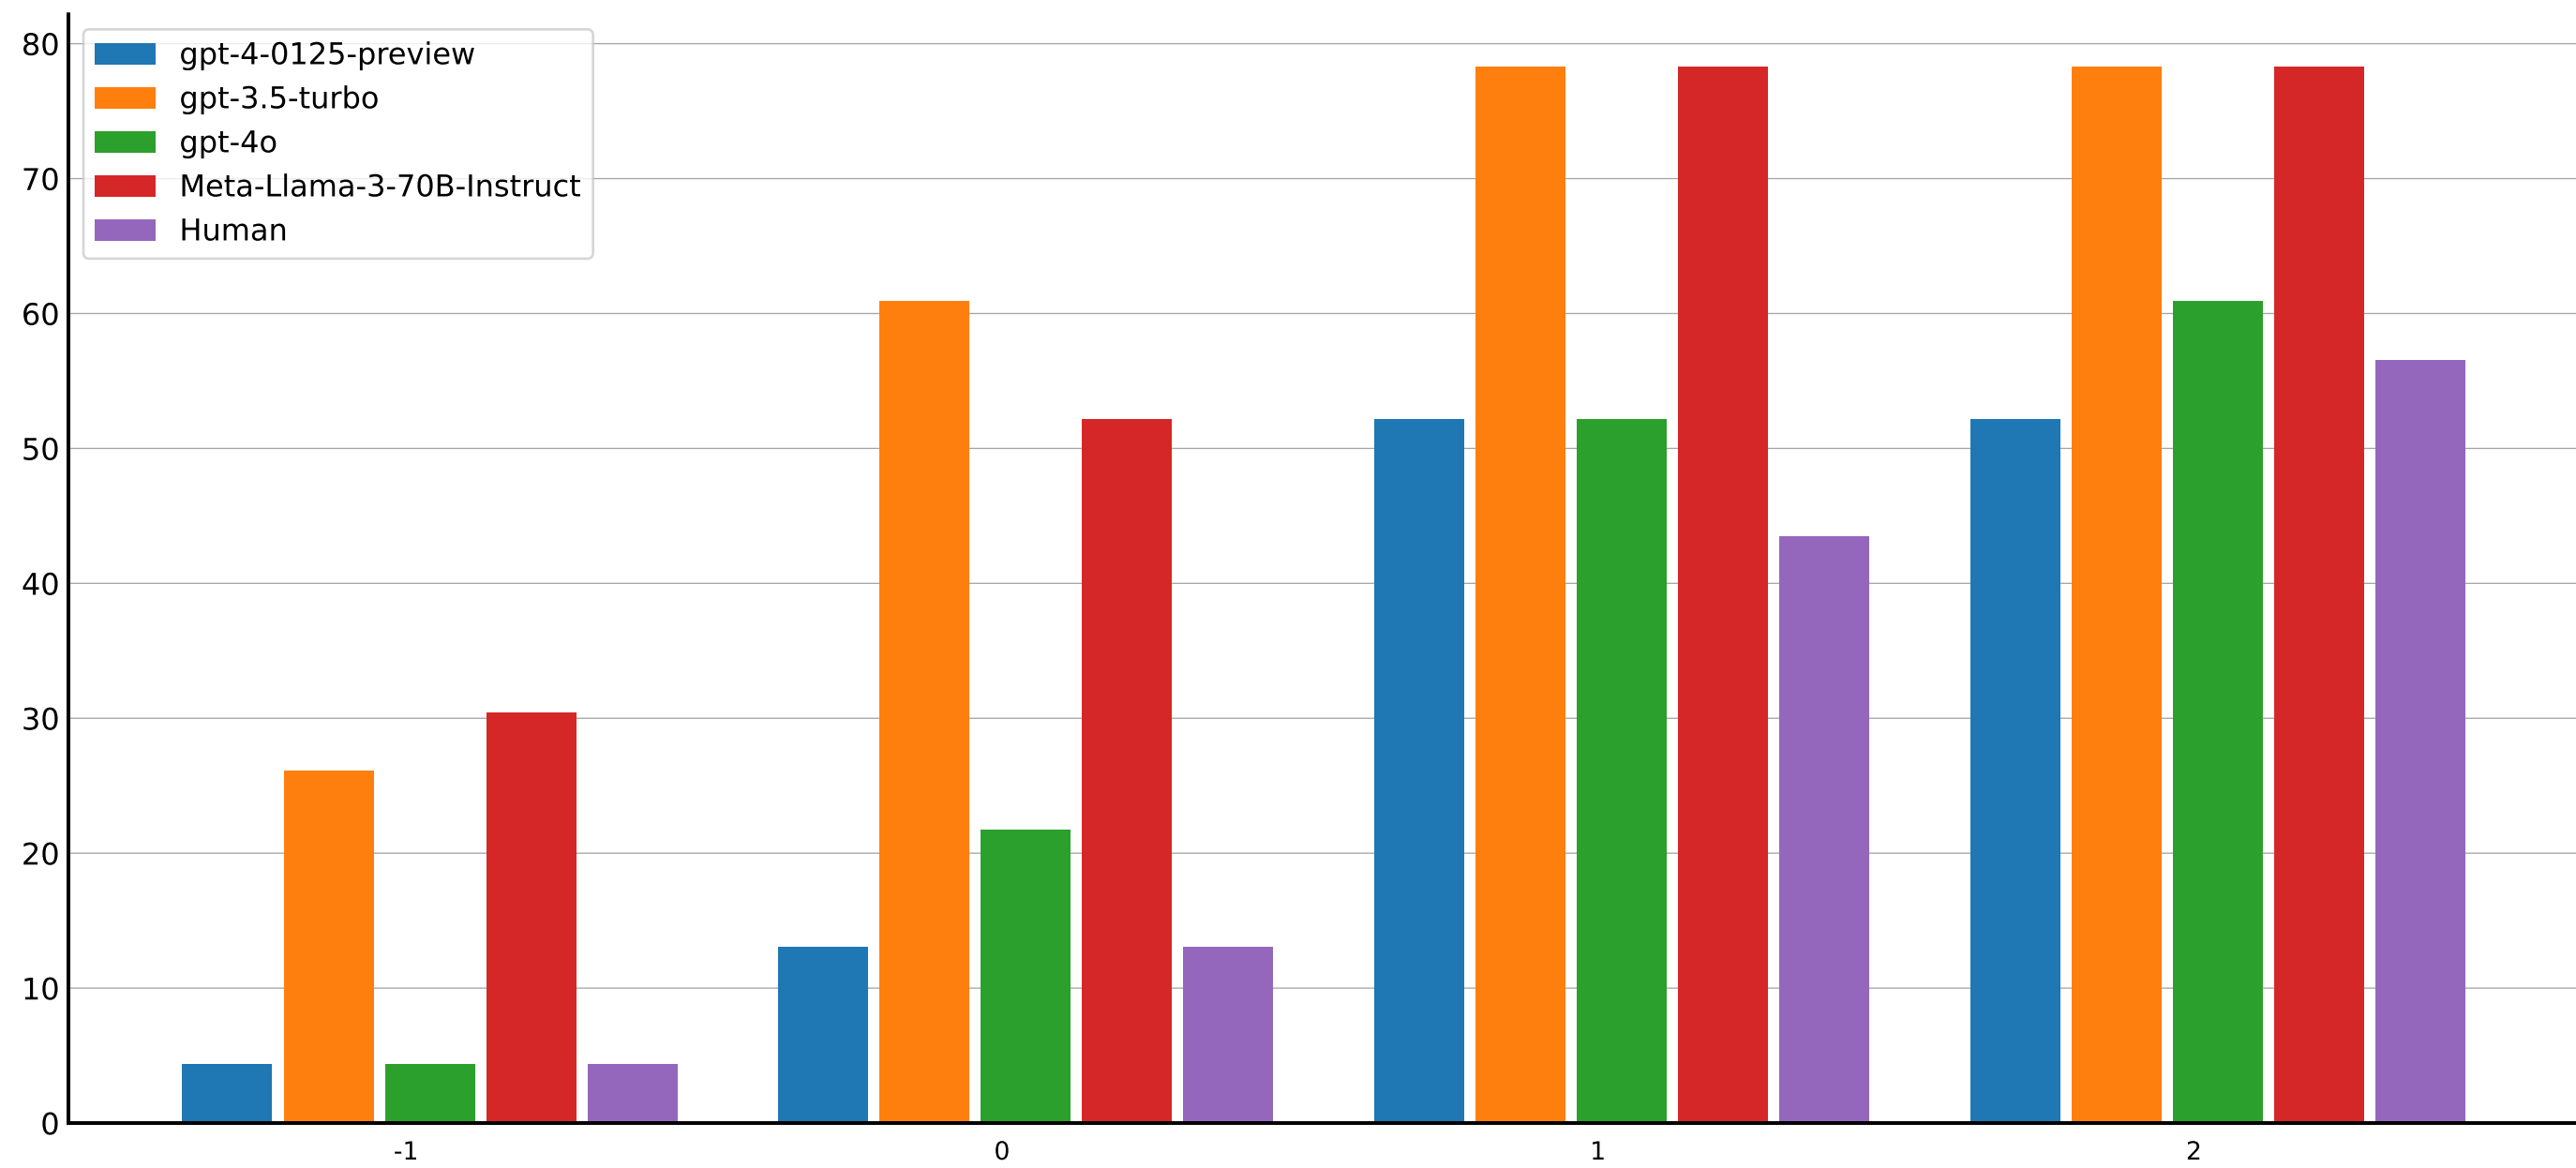

Supplement: supplementary_material [file attachment]

Success Rate by File Number

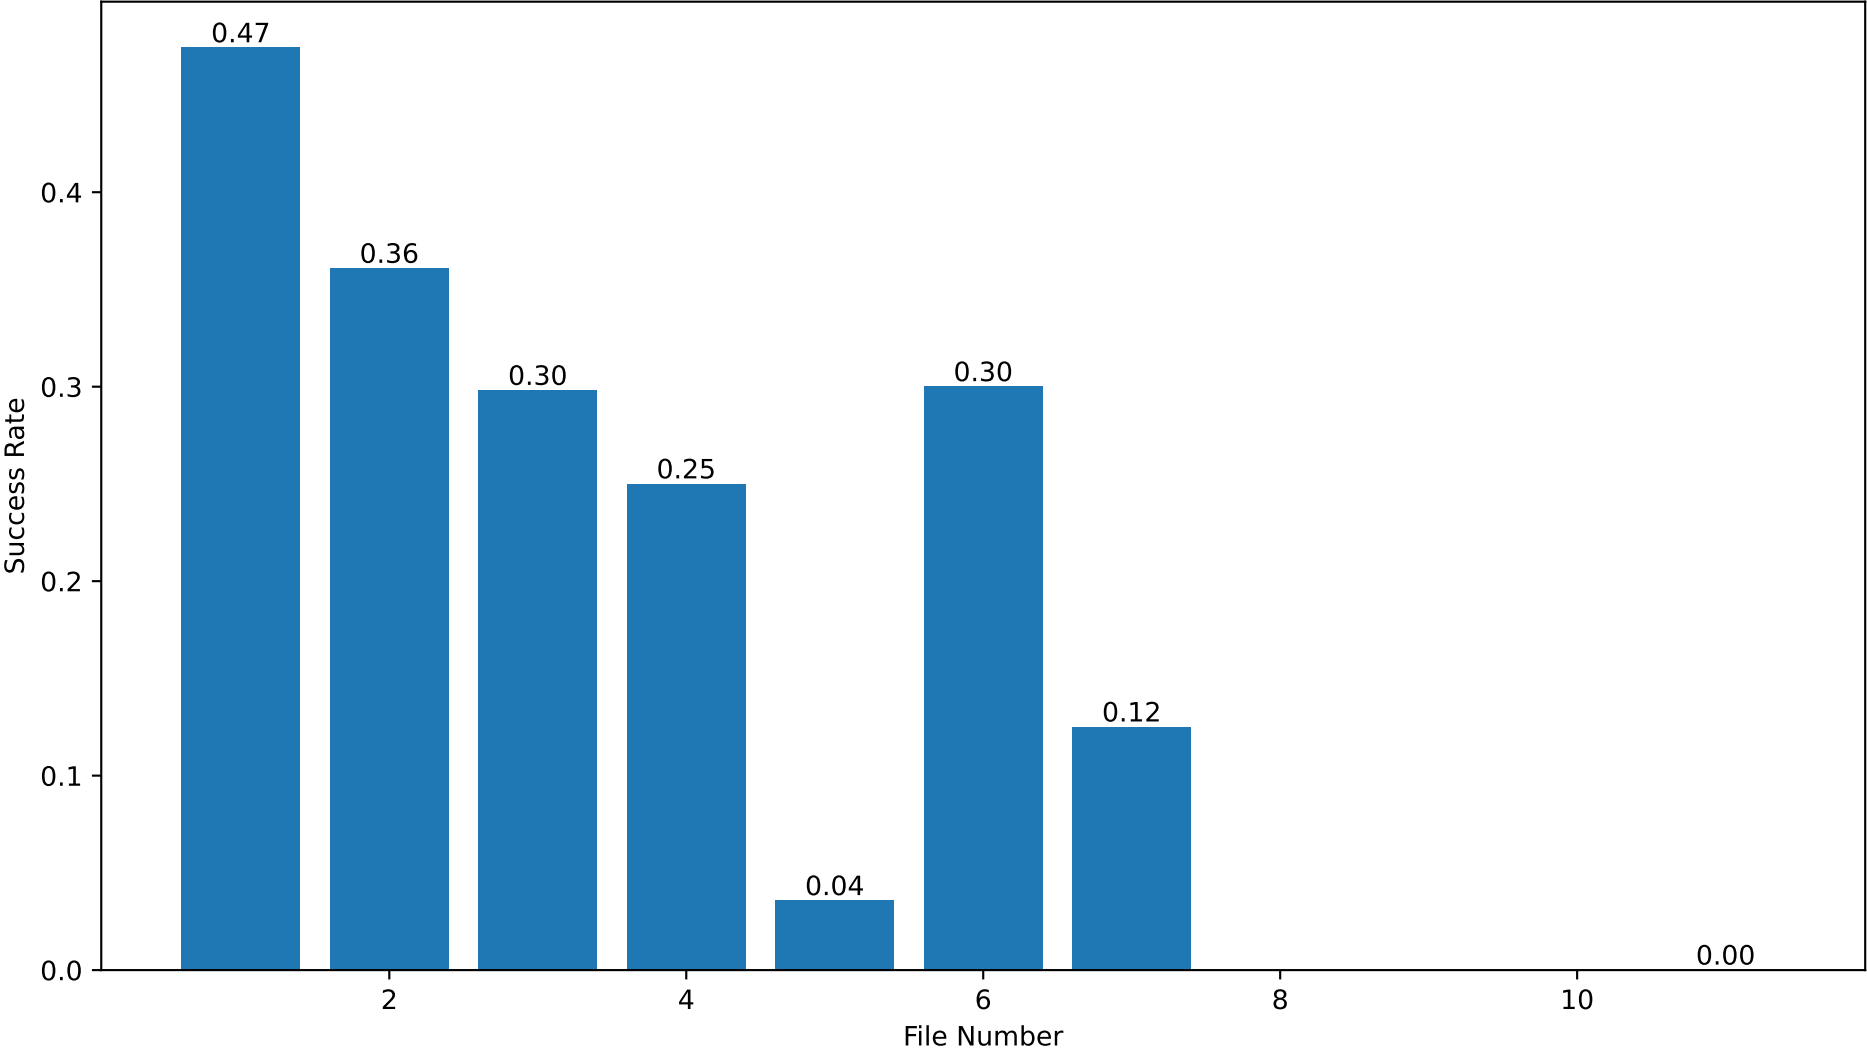

Supplement: supplementary_material [file attachment]

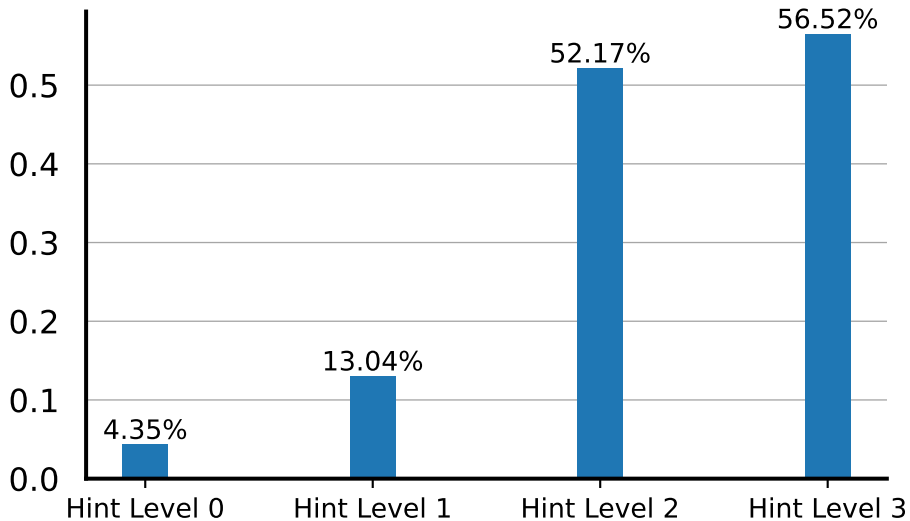

Supplement: supplementary_material [file attachment]

Success Rate by Platform

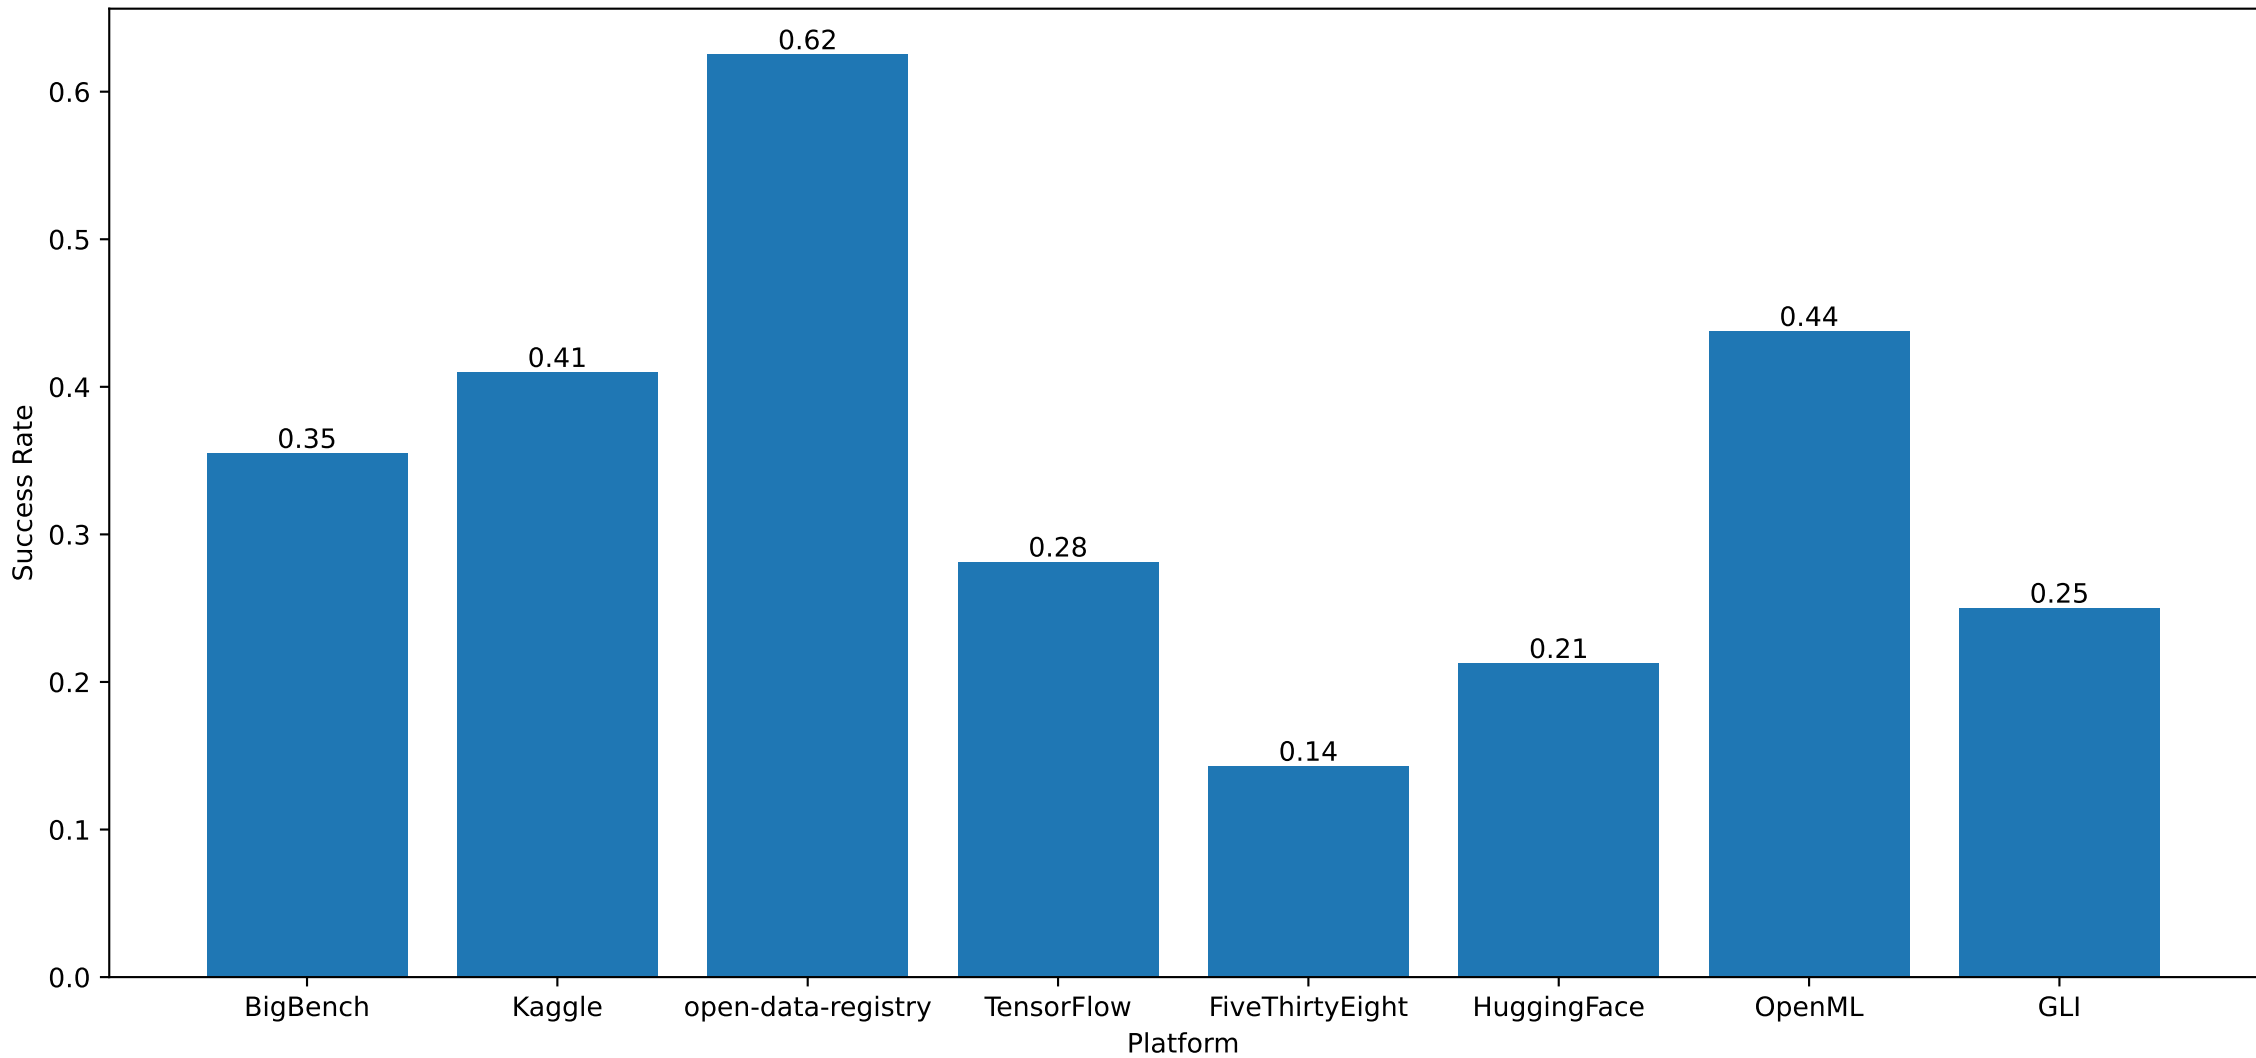

Supplement: supplementary_material [file attachment]
